# Supplementary material for: Thiourea priming enhances salt tolerance through co-ordinated regulation of microRNAs and hormones in Brassica juncea
Source: PubMed Central journal article supplement (PMC5382540; doi:10.1038/srep45490), 2017-04-06
Supplement: srep45490-s1.pdf [file srep45490-s1.pdf]

**Supplementary Information**

**Thiourea priming enhances salt tolerance through co-ordinated regulation of microRNAs  
and hormones in *Brassica juncea***

Ashish Kumar Srivastava<sup>1\*</sup>, Gaurav Sablok<sup>2</sup>, Michael Hackenberg<sup>3</sup>, Uday Deshpande<sup>4</sup>, Penna  
Suprasanna<sup>1</sup>

**Supplementary Fig. 1: Read length distribution analysis:** A) Distribution of adapter cleaned reads length across the libraries; B) Distribution of reads mapped in *Brassica rapa* genome across the libraries.

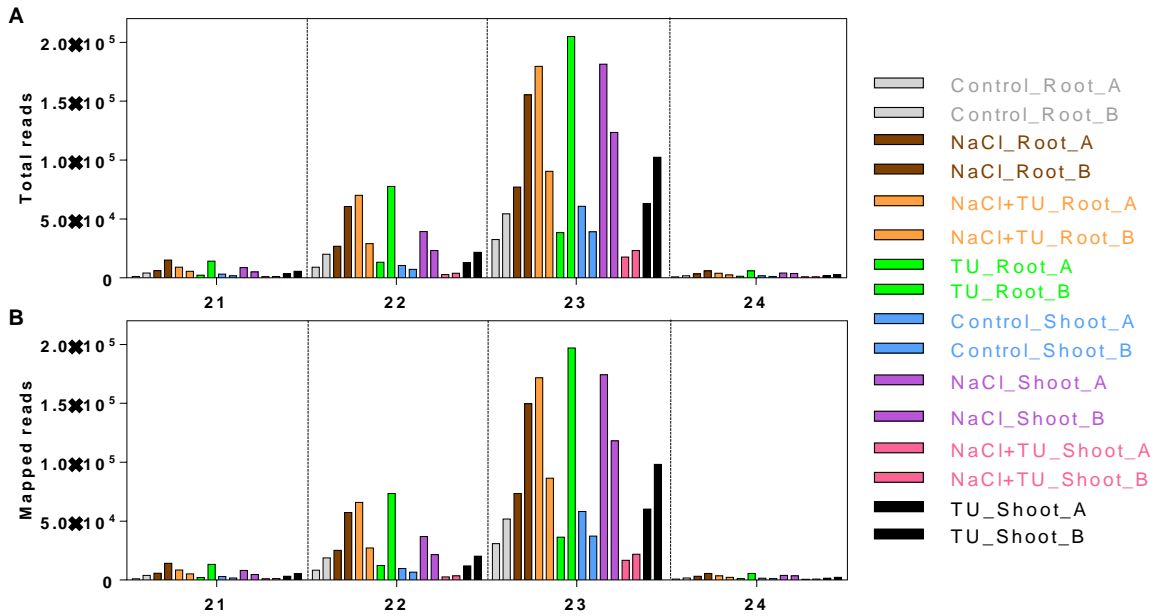



**Supplementary Fig. 3: Melting curve profiles of novel miRNAs.** The novel miRNAs were amplified from total RNA using stem-loop PCR (refer supplementary table-14 for primer details). The Corbett Rotor Gene 6000 machine was used for generating melting curves. The single peak on melt curve show specific amplification. The mature miRNA sequence was confirmed by sequencing amplified product of stem-loop PCR.

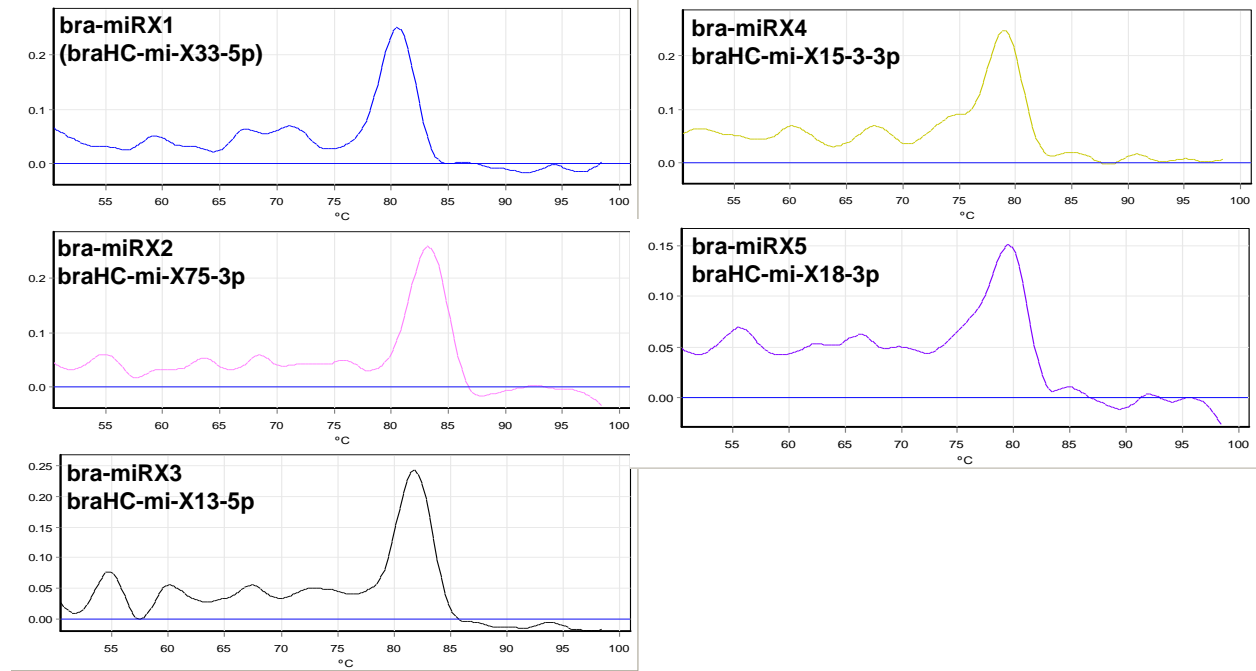

**Supplementary Fig. 4: Representative HPLC profile showing the peak separation of auxin standards.** The standards (10 mg/ml) were mixed together in 1:1 ratio to make 100  $\mu$ l and then 25  $\mu$ l of this was injected in HPLC to follow their separation as per the method described previously by Srivastava et al. (2013).

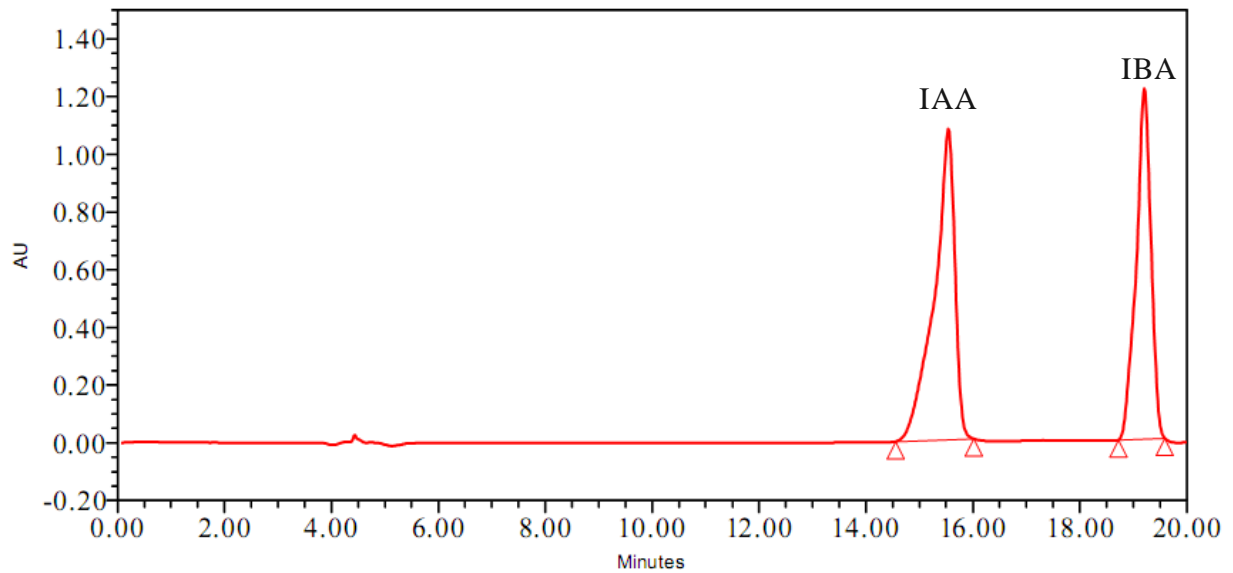

**Supplementary Fig. 5: Representative HPLC profile showing the peak separation of jasmonate standards.** The standards (10 mg/ml) were mixed together in 1:1 ratio to make 100  $\mu$ l and then 50  $\mu$ l of this was injected in HPLC to follow their separation as per the method described previously by Srivastava et al. (2013).

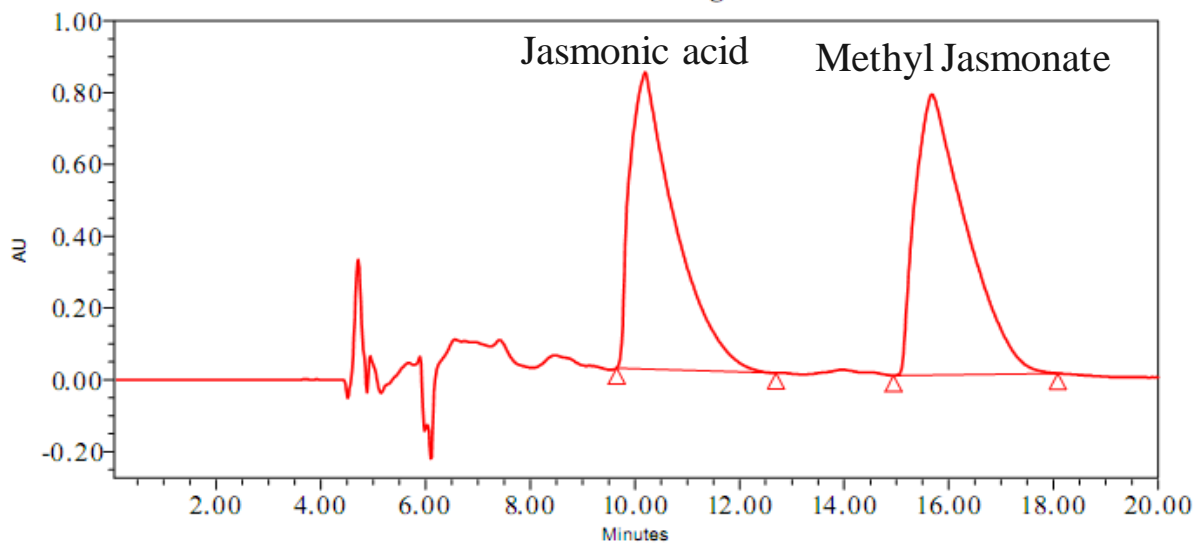

**Supplementary Table- 1: Sequencing and mapping summary of the smallRNAs reads using cross species mapping to *Brassica rapa* genome.**

| Organ | Treatment | Raw Reads | Genome mapped reads | Unique mapped reads | Unique reads mapped to genome | Genome reads mapped (%) |
|-------|-----------|-----------|---------------------|---------------------|-------------------------------|-------------------------|
| Root  | Control_A | 91717     | 82067               | 59082               | 53694                         | 89.48                   |
|       | Control_B | 503035    | 453057              | 331669              | 306487                        | 90.06                   |
|       | NaCl_A    | 260889    | 225762              | 137851              | 120401                        | 86.54                   |
|       | NaCl_B    | 690306    | 566362              | 316173              | 272650                        | 82.05                   |
|       | NaCl_TU_A | 459802    | 406978              | 201884              | 180129                        | 88.51                   |
|       | NaCl_TU_B | 298500    | 255444              | 105401              | 89938                         | 85.58                   |
|       | TU_A      | 1369302   | 1131501             | 581416              | 495788                        | 82.63                   |
|       | TU_B      | 1448849   | 1206182             | 678602              | 586740                        | 83.25                   |
| Shoot | Control_A | 337491    | 321244              | 100845              | 93983                         | 95.19                   |
|       | Control_B | 120950    | 113734              | 39348               | 36247                         | 94.03                   |
|       | NaCl_A    | 380611    | 360055              | 76606               | 69911                         | 94.60                   |
|       | NaCl_B    | 175370    | 167902              | 44720               | 41012                         | 95.74                   |
|       | NaCl_TU_A | 711388    | 668119              | 282595              | 265823                        | 93.92                   |
|       | NaCl_TU_B | 351951    | 333526              | 108109              | 99923                         | 94.76                   |
|       | TU_A      | 462435    | 437111              | 190325              | 179353                        | 94.52                   |
|       | TU_B      | 351775    | 330183              | 163110              | 153080                        | 93.86                   |

**Supplementary Table-2: Expression profiling of conserved miRNAs from *Brassica juncea* roots using small RNA sequencing.** The *B. juncea* seedlings were grown hydroponically for 15 d and then subjected to different treatments such as control (1/2 MS), NaCl (125 mM), NaCl (125 mM) + TU (75  $\mu$ M) and TU (75  $\mu$ M). For NaCl+TU and TU alone treatments, 24 h pre-treatment with same concentration of TU was also given. At 4 h after treatment, roots were harvested independently and subjected to small RNA sequencing on SOLID platform. The differential expression is depicted either on the basis of their statistical significance (\*) where  $p < 0.05$  or on the basis of their expression significance (\*\*) where log fold change is  $\geq 1$ . All the differentially expressed miRNAs are also marked as bold.

| miRNAs                                                             | C Vs. NaCl          | C Vs. NaCl+TU       | C Vs. TU           |
|--------------------------------------------------------------------|---------------------|---------------------|--------------------|
| <b>A. On the basis of statistical significance (logFC/p-value)</b> |                     |                     |                    |
| bra-miR158-3p                                                      | <b>-2.27/0.02*</b>  | <b>-1.20**/0.20</b> | <b>-1.54**/0.1</b> |
| bra-miR161-5p                                                      | <b>-1.91/0.02*</b>  | <b>-1.52**/0.08</b> | -0.93/0.27         |
| bra-miR171e                                                        | -0.83/0.48          | <b>-2.49*/0.04</b>  | -0.53/0.66         |
| bra-miR390-3p                                                      | -0.38/0.71          | <b>-3.15*/0.003</b> | -0.35/0.73         |
| bra-miR403-3p                                                      | <b>-1.63**/0.07</b> | <b>-2.17*/0.02</b>  | -0.55/0.53         |
| bra-miR824                                                         | <b>1.71**/0.10</b>  | <b>2.28*/0.03</b>   | <b>1.47**/0.15</b> |
| bra-miR157a                                                        | 0.39/0.61           | 0.91/0.22           | <b>2.02*/0.01</b>  |
| bra-miR164a                                                        | <b>1.45**/0.06</b>  | 0.36/0.64           | <b>1.95*/0.01</b>  |
| bra-miR172c-3p                                                     | <b>1.75**/0.10</b>  | 0.31/0.77           | <b>2.39*/0.03</b>  |
| bra-miR395a-3p                                                     | 0.04/0.80           | <b>1.02**/0.20</b>  | <b>3.55*/0.002</b> |
| <b>B. On the basis of expression significance (logFC)</b>          |                     |                     |                    |
| bra-miR168b-5p                                                     | -0.38               | <b>-1.04**</b>      | -0.13              |
| bra-miR171a                                                        | -0.74               | <b>-1.95**</b>      | -0.18              |
| bra-miR172d-3p                                                     | 0.6                 | <b>1.61**</b>       | 0.76               |
| bra-miR390-5p                                                      | -0.64               | <b>-1.56**</b>      | 0.5                |
| bra-miR396b-5p                                                     | -0.11               | <b>-1.09**</b>      | 0.23               |
| bra-miR5654a                                                       | -0.82               | <b>-1.40**</b>      | -0.54              |
| bra-miR1140                                                        | 0.44                | 0.03                | <b>1.05**</b>      |
| bra-miR172b-5p                                                     | 0.52                | 0.77                | <b>1.21**</b>      |
| bra-miR1885b                                                       | 0.41                | -0.03               | <b>1.27**</b>      |
| bra-miR319-5p                                                      | 0.7                 | 0.05                | <b>1.24**</b>      |
| bra-miR395a-5p                                                     | 0.64                | 0.79                | <b>1.48**</b>      |
| bra-miR158-5p                                                      | <b>-1.03**</b>      | -0.79               | <b>-1.71**</b>     |
| bra-miR161-3p                                                      | <b>-1.46**</b>      | <b>-1.13**</b>      | <b>-1.13**</b>     |
| bra-miR1885a                                                       | <b>-1.43**</b>      | <b>-1.13**</b>      | <b>-1.05**</b>     |
| bra-miR391-3p                                                      | <b>-2.43**</b>      | <b>-2.19**</b>      | <b>-2.87**</b>     |
| bra-miR396-3p                                                      | <b>1.66**</b>       | <b>1.70**</b>       | <b>3.00**</b>      |
| bra-miR9555a-3p                                                    | <b>-2.42**</b>      | <b>2.57**</b>       | 0.42               |



**Supplementary Table-3: Expression profiling of conserved miRNAs from *Brassica juncea* shoot using small RNA sequencing.** The *B. juncea* seedlings were grown hydroponically for 15 d and then subjected to different treatments such as control (1/2 MS), NaCl (125 mM), NaCl (125 mM) + TU (75  $\mu$ M) and TU (75  $\mu$ M). For NaCl+TU and TU alone treatments, 24 h pre-treatment with same concentration of TU was also given. At 4 h after treatment, shoots were harvested independently and subjected to small RNA sequencing on SOLID platform. The differential expression is depicted either on the basis of their statistical significance (\*) where  $p < 0.05$  or on the basis of their expression significance (\*\*) where log fold change is  $\geq 1$ . All the differentially expressed miRNAs are also marked as bold.

| miRNAs                                                              | C Vs. NaCl          | C Vs. NaCl+TU       | C Vs. TU            |
|---------------------------------------------------------------------|---------------------|---------------------|---------------------|
| <b>A. On the basis of statistical significance (logFC /p-value)</b> |                     |                     |                     |
| bra-miR164b-5p                                                      | <b>-1.64**/0.06</b> | <b>-1.73*/0.05*</b> | -0.11/0.88          |
| bra-miR172c-3p                                                      | -0.18/0.89          | <b>-2.17*/0.04*</b> | <b>-1.31**/0.22</b> |
| bra-miR396-3p                                                       | -0.61/0.54          | <b>-2.72*/0.01</b>  | 0.65/0.48           |
| bra-miR395a-3p                                                      | <b>2.06**/0.13</b>  | <b>1.08**/0.38</b>  | <b>2.93*/0.01</b>   |
| bra-miR403-5p                                                       | 0.26/0.85           | <b>1.53**/0.07</b>  | <b>1.70*/0.05</b>   |
| bra-miR5725                                                         | <b>1.62**/0.68</b>  | <b>2.67**/0.14</b>  | <b>3.31*/0.01</b>   |
| bra-miR396b-5p                                                      | <b>1.43**/0.09</b>  | <b>2.57**/0.001</b> | <b>3.32**/0.002</b> |
| <b>B. On the basis of expression significance (logFC)</b>           |                     |                     |                     |
| bra-miR158-3p                                                       | <b>-1.81**</b>      | -0.23               | 0.26                |
| bra-miR172d-5p                                                      | <b>-1.05**</b>      | -0.62               | 0.3                 |
| bra-miR319-5p                                                       | <b>1.09**</b>       | -0.56               | -0.15               |
| bra-miR160a-5p                                                      | <b>1.55**</b>       | <b>1.40**</b>       | 0.44                |
| bra-miR161a-3p                                                      | <b>-1.08**</b>      | <b>-2.30**</b>      | -0.51               |
| bra-miR172d-3p                                                      | <b>-2.20**</b>      | <b>-3.16**</b>      | -0.15               |
| bra-miR395a-5p                                                      | <b>2.44**</b>       | 0                   | <b>1.95**</b>       |
| bra-miR5712                                                         | <b>-4.44**</b>      | <b>-1.39**</b>      | <b>-2.00**</b>      |
| bra-miR1885b                                                        | 0.18                | <b>1.95**</b>       | <b>1.86**</b>       |
| bra-miR9563a-5p                                                     | 0                   | <b>5.03**</b>       | <b>3.28**</b>       |

**Supplementary Table 4: Details of the mature and hairpin sequence of novel miRNAs.**

| <b>microRNA</b>                 | <b>Mature miRNA sequence</b> | <b>Hairpin sequence</b>                                                                                                                                                                                   |
|---------------------------------|------------------------------|-----------------------------------------------------------------------------------------------------------------------------------------------------------------------------------------------------------|
| (bra-miRX-1) braHC-mir-X33-5p   | GTTTTTCAGGTGATTTTAGGGTG<br>T | TTAAAGTTTTTCAGGTGATTTTAGGG<br>TGTTTAGGTGGAGTTTCTTAGTTAA<br>AAAAAATTTAAACCCAAATCTCA<br>TGGTTTTAAGTTATATTCTAGAGTG<br>GTTAACATAAATCACCTAAATCT<br>CTGCAACTTATTAA                                              |
| (bra-miRX-2) braHC-mir-X75-3p   | TGCCAAAGGAGAGTTGCCCTG        | AATAGGGCATCTTTCTATTGGCAC<br>GAGACAGTGAGATGTGCTCTTTTTT<br>TTGTGTGTGTTTCATGGCTACTTGGC<br>TCTGTCACTTGCCAAAGGAGAGTT<br>GCCCTGTCACT                                                                            |
| (bra-miRX-3) braHC-mir-X13-5p   | TCTTTGGCATTCTGTCCACCT        | TATCTTTGGCATTCTGTCCACCTCC<br>TCTACATATGTGTATGGACGATGT<br>GTTCTGTGAGTGGAGGTGGGCATA<br>CTGCCAATAGAGATCT                                                                                                     |
| (bra-miRX-4) braHC-mir-X15-3-3p | TTTTTAGTTAAAAGTTAAGGGA<br>C  | GGTTCCTTAACTTTTAACTAAAAA<br>CGCTAAGAGATTTTTCTCAAGTCCC<br>TTATTTAAAGACCGTTCCTTAGTTT<br>TTTTAGTTAAAAGTTAAGGGACTC<br>TAC                                                                                     |
| (bra-miRX-5) braHC-mir-X18-3p   | AATCGGACCAATAAAAAACTC        | TTTTTGAGTTTTTTATTGGTCTGAT<br>TTATTTAATAATCGGTGCGCTAATC<br>GGTAAATGAGCCGATTAATCGGTT<br>ATTGGGCCGATTAATTGGTGACCG<br>ATTTTCTGGTCCGATTATGGTAAAT<br>TCGGGGCGGTCCGTCTTTATAATA<br>AATCGGACCAATAAAAAACTCAAA<br>AA |

**Supplementary Table-5: Stem-loop real-time PCR based expression profiling of novel miRNAs from root and shoot of *Brassica juncea*.** The stem-loop PCR based expression profiling of identified novel miRNAs were performed from root (A) and shoot (B) of seedlings given different treatment conditions such control (1/2 MS), NaCl (125 mM), NaCl (125 mM) + TU (75  $\mu$ M) and TU (75  $\mu$ M) for 4 h. For NaCl+TU and TU alone treatments, 24 h pre-treatment with same concentration of TU was also given. The values represent the average log<sub>2</sub> value of expression fold different of three independent biological replicates. The change in log<sub>2</sub> expression  $\geq 1$  is given bold and marked with asterisk (\*).

| <b>A. At 4 h after treatment in Roots</b> |                                |                                      |                      |                     |
|-------------------------------------------|--------------------------------|--------------------------------------|----------------------|---------------------|
| <b>S. No.</b>                             | <b>miRNAs</b>                  | <b>logFC/SD as per stem-loop PCR</b> |                      |                     |
|                                           |                                | <b>C Vs. NaCl</b>                    | <b>C Vs. NaCl+TU</b> | <b>C Vs. TU</b>     |
| 1.                                        | braHC-mir-X33-5p (bra-mirX1)   | -0.022/0.003                         | <b>-1.062/0.036</b>  | -0.71/0.034         |
| 2.                                        | braHC-mir-X75-3p (bra-mirX2)   | 0.276/0.025                          | <b>-1.862/0.023</b>  | <b>-5.36/0.032</b>  |
| 3.                                        | braHC-mir-X13-5p (bra-mirX3)   | 0.41/0.080                           | <b>-5.362/0.09</b>   | <b>-5.983/0.078</b> |
| 4.                                        | braHC-mir-X15-3-3p (bra-mirX4) | 0.442/0.053                          | -0.276/0.010         | 0.695/0.062         |
| 5.                                        | braHC-mir-X18-3p (bra-mirX5)   | 0.313/0.023                          | <b>-1.589/0.015</b>  | -0.66/0.036         |

| <b>B. At 4 h after treatment in Shoot</b> |                                |                                      |                     |                 |
|-------------------------------------------|--------------------------------|--------------------------------------|---------------------|-----------------|
| <b>S. No.</b>                             | <b>miRNAs</b>                  | <b>logFC/SD as per stem-loop PCR</b> |                     |                 |
|                                           |                                | <b>C Vs. NaCl</b>                    | <b>CVs. NaCl+TU</b> | <b>C Vs. TU</b> |
| 1.                                        | braHC-mir-X33-5p (bra-mirX1)   | 0.832/0.157                          | <b>1.668/0.328</b>  | 0.185/0.040     |
| 2.                                        | braHC-mir-X75-3p (bra-mirX2)   | 0.714/0.071                          | <b>1.537/0.151</b>  | -0.095/0.013    |
| 3.                                        | braHC-mir-X13-5p (bra-mirX3)   | 0.705/0.122                          | <b>1.165/0.258</b>  | -0.932/0.055    |
| 4.                                        | braHC-mir-X15-3-3p (bra-mirX4) | 0.543/0.096                          | 0.445/0.031         | -0.539/0.029    |
| 5.                                        | braHC-mir-X18-3p (bra-mirX5)   | <b>1.021/0.116</b>                   | <b>1.113/0.050</b>  | 0.346/0.044     |

**Supplementary Information-1: Transcript IDs and sequences of all the microRNA targets whose expressions are validated using real-time PCR. For details of the primer sequence refer Supplementary Table-15.**

**1) bra-miR158-3p (Brara.I01252.1; Pentatricopeptide repeat (PPR) superfamily protein)**

ATGTTGGCTAGGGTTTGCAGATCCAAATCTTCTTCTCCTGCTGTTTCAGCGGCTAGATTGTT  
CTGTACGAGATCGATTCGTTCATGCTCTGGCCAAGGAAAGTAGTGTTGGAGAGAGTGGGGG  
AAGCAGGAGCGGGTTTCATGAAATCAAAGGGTTAGATGATGCGATTGATTTGTTCAAAGAC  
ATGGTACGATCTAGTCCTTTACCTTCAGCAATCGATTTCAACAAGCTAATGGGTGTGGTGG  
TGAGAATGGAAAGGCCCGATCTTGTGATTTCTCTCTATCAGAAGATGGAAAGGAAACAGAT  
TCGACGTGATATCTACAGCATGAACATCCTTATAAAATGTTTCTGCAGCTGCTCTAAGCTTC  
CCTTTGCTTTGTCTACATTTGGATCAGTGATAAGTATCTTCATAGACGGATATTGTGGGGCT  
AAGAGGGTAGATGATGGAATGGAACCTTCTCCATGAGATGTCTAGAAGAGGATTAGTTGCTA  
ACACAATTACTTACACCACTCTTATTCACGGGTTCTGTCCAGGAGATGATTTCTAGTGGTGTG  
TGCCTTAATGTCGTTACTTGTAGCACTTTACTGGACGGTATCTGCGATAATGGGAAACTAAA  
AGACGCATTGGAAATGTTTAAGGTTATGCAGAAGAGTAAGATGGATCTTGATGCTAGTCAC  
CCCTTCAACGCTGTGGAACCTGATGTTCAAACCTACAATATATTGATCTGCGGCTTGATCAA  
TAACGGGAATTTTTTAGAGGCTGAGGAATTATATGAGGAGATGCCCCACAGAGGAATGGTT  
GATGATGGGGTGGAGCTTTTCTGCGAGATGGGTCCAAGAGGGATAGTTGCTAATGCAATT  
ACTTACATCACTTTGATTCGTGGTTTTGGTAAAGTGGGTAATATTAATGGTGCTCTAGACAA  
TTTCCAGGAGATGATTTCAAGTGGTGAATTCCTGATACCATTACTATCCGCAATATGCTGA  
CTAGTTTATGGAGTAAAGAGGAACTAAAAAGAGCAGTGGCAATGCTTGAGGATCTGCAGAT  
GAGTATGTTATATTATTGGTCTGAACTAAAGAAGCACACCTTCCAGAAGATTTCAAGGTGTTA  
AAAGATGTTTAGGTGTCTTTCTTTCTGTAGCTGTCTCCATGGTTATTGTCAAGCTCGGTCT  
TCATGGTGGCTCCAAGGTTGGATCCAGAGAGAGTGA

**2) bra-miR161-5p (c127222\_g1\_i1: gi|297801450|ref|XP\_002868609.1| Pentatricopeptide repeat-containing protein)**

ACGGACTTGTGGATAACGCGATGAGCTTGTTTAACCAAATGGAGATTAAGCTGACGCCGT  
TACTTACACGTCTCTCGTGAACGGTCTTTGTAACCTCCGGTAGGTTGAGTGACGCCGTTAGT  
TTACTTAACGATATGATGAGAAGGAGGATCAACCCTGATGTAGTCACTTTCAATGCGTTGAT  
CGACGGGTTTGTGAAAAAGGGGAAGCTTCTGGAGGCTAGAGAGGTCTACAGCGAGATGAT  
TCGAGTCTCTGTAGCTCCTGATGTTTTCA

**3) bra-miR171e**

**(TCONS\_00042811: gj|15236725|ref|NP\_191926.1| Scarecrow-like protein 6)**

ACACAAAAGAGGAGAGAGAGAGAGAGAGAGAGAGGATGAAGCGCACTTTGCCACTTTAATAT  
CCTGCACGCATCCACAACCCAGAAGAAGAAGAAGAAGAAAAGGACAGAAGAGACTT  
GAGAAGATAGTAGTGAGCCAAAGGGTTTGTGAACTTTGTTTGTGCTTNNNNNNNNNNNNNN  
NNNNNNNNNNNNNNNNNNNNNNNNNNNNNNNNNNNNNNNNNNNNNNNNNNNNNNNNNNNN  
NNNNNNNNNNNNNNNNNNNNNNNNNNNNNNCAAAGAGCCCACCTCTGTTCTCAGC  
CCCCTCACTACATCCTCCTCCACGGTGTCTTCTCGCACGGCGTAAGCACTGCCGTCGGA  
GGCGGCGGTATCTCCACTGCCATCTCCGGCGGGCGNNNNNNNNNNNNNNNNNNNNNNNN  
NNNNNNNNNNNNNNNNNNNNNNNNNNNNNNNNNNNNNNNNNNNNNNNNNNNNNNNNNN  
NNNNNNNNNNNNNNNNNNNNNNNNNNNNNGACAACGACCAGAGCATCCTCAGGCTCATCAT  
GATGGGTGACTCCCAAGAAGATCCTTCTCACGAACTTAACAACATTCTCCAGACCTCATCA  
GCTTCTCAATCTCCCGCCACCTTTCATAACTCCGACTACACATCCCTCGCCAGCTTCGGAG  
TCGTGATAACACCGGCTTCGGCTTAGACCACTCGGTCCCACCACCTCTGTTTCAGGCAC  
AAGTCGAGGAGAAGCCGCCCCACCAACTCCTGATCAACCAAAGCCAAACTCATTTACCCA  
GAACCCCTCCCTCTTCTACGGCCATCATCATATCCCCGCGGGCGGCGACGCTACCTCCGCC  
GGCAAAGCGTCTCAACCAAGGCTCCGTGGGTCAAGGGATGATAACGGAGCAGCTGTTCAA  
GGTGGCGGAGGTGATAGAGAGCGGTGGCGACACTAGTCTGGCTCAGGGGATATTGGCGC  
GGCTCAATCAACAGCTCTCTTCTCCCGTGGGAAAGCCATTGAAAGGGCAGCTTTCTACTT  
CATAGAGGCTCTCCACAACGTCTCCTCCACAACGGAAACGCCTCCCAACCACCCCTAAAC  
CCTTACTCCCTCATCTTCAAGATCTCCGCCTACAAATCCNNNNNNNNNNNNNNNNNNNNNN  
NNNNNNNNNNNNNNNNNNNNNNNNNNNNNNNNNNNNNNNNNNNNNNNNNNNNNNNNNN  
NNNNNNNNNNNNNNNTGGCTTCAACCGTCTCCACATCATCGACTTCGACATCGGCTACGGT  
GGCCAATGGGCTTCCCTCATGCAAGAGCTCGTCCTCCGCGACAACAACGCTCATCCCCTC  
TCTCTCAAATCACAGTCTTCGCTTCTCACGATGACCACCACCAGCAGCAGCTTGAGCTGG  
GCTTCACTCAAGACAACCTCAAGCACTTCGCCTCGGAGATCAACATCTCCCTCGACATCCA  
GGTTCTGAGCTTGGACCTCCTCGCCTCTTCTCCTCCCCTAACTCCTCAGACAAAGAAGAA  
GCCGTCGCCGTTAATCTCTCCCCCGCCTCCTTCNNNNNNNNNNNNNNNNNNNNNNNNNN  
NNNNNNNTCCCTTCGCTCGTCCTCCGTTTCGTGAAACATCTCTCTCCGACGATCATCGTCTG  
CTCCGACAGAGGGTGCAGAGAGGACGGATCTGCCTTTCCTCAGCAGCTCCTCCACTCGCT  
GCAGTCACACGCCGCTCTCCTCGAGTCCCTCGACGCCGTCAACGCCAACCTCGACGCTAT  
GCAGAAGATCGAGAGGTTTCTCATACAGCCGGAGATCGAGAAGCTCGTCCTCGATCGTAG  
CCGTCCGATCGAAAGGCCAATGATGACGTGGCAAGCAATGTTTCATGCAGATGGGGTTCTC  
TCCTGTGGCCACAGCAACTTCACGGAGTCTCAGGCAGAGTGTTTGGTTCAACGGNNNNN  
NNNNNNACGCCGTAAGAGGCTTTCACGTGAGAAAGAAACAACACTCTCTTCTCTCTGCT  
GGCAAAGGACAGAACTTGTGCGAGTCTCCGCCTGGAGATGTGCTCCTGACTCATCCCTC  
CCCA

**4) bra-miR390-3p**

**(Brara.H02653.1; VACUOLAR PROTEIN SORTING-ASSOCIATED PROTEIN 18 HOMOLOG)**

ATGGATCAAGGAAGGCAAGTGTGGCAGTGGATCTTCTCGAGAGATATGCCACAAAGAATC  
GTGGCATGATCACATGTATGGCTTCTGGAAACGATGTGATTGTTCTTGGAACAAGCAAAGG  
ATGGATCATCCGCCACGATTTTGGACTTGGGAGTTCTTATGATATTGATCTCTCTGTTGGTC  
GAACTGGGGACCAATCGATCCACAAGTTTTTGTGGATCCTGGTGGTAGCCATTGCGTTGC  
TACGGTGACTGGTGTGGAGGAGCTGAGACTTTTTACACTCATGCTAAATGGCCTAAGCCG  
CGTGTCTTGAGCCGTTTGAAGGCTTGCTGGTTAACGCGGTGGCTTGAACAAGCAGCAG  
ATAACAGAAGTTTCAACTAAGGAGATCATCCTTGGCACTCAGGATGGGCAGCTGTTTGAGA  
TGGCTGTGCATGAGAAGGATAAGAGAGAGAAGTACGTCAAGTTTTTGTTCGAACTTGAAGA  
ACTTCCCGAGGCCTTCATGGATTTACAGATGGAAACAGCCAACATAAGCAGTGGAAATGAGG  
TACTATGTGATGGCTGTAACTCCTACTCGACTCTATTCTTCACCGGGATTGGAACATTAGA  
ATCTGTCTTTGCTAGTTATAAAGAACGTGCAGTTCGTTTTATGGAACCTCCTGGTGAATAC  
CAAACAGGCAAGTGCTAATCACCTTATATGAAAGAAATCACAAAGCTGAACTACATTTCTTT  
ATAAAGCAACGAAGAGCGGTGCATTTTGCATGGCTTTCAGGAACAGGAATTTATCATGGTG  
GCCTAAATTTTGGAGCTCAGCACAGTAATCCAAATGGTGTGAGAATTTGTGGAGAGCAA  
AGCGCTGTTGGACTACTCAAACTGAGTGATGGCACTGAGGTAGTCAAGCCTAGTTCAATG  
GCACTCTCAGAGTATCATTTCTTGCTTCTTATTGGGAATAAGGTTAAGGTTGTGAATCGGAT  
AAGTGAACAAATCATAGAAGAGCTCCATTTTGATATATCGGCTGATTCAGCTTCGAGGGGC  
ATCATAGGACTTTGCAGCGATGCCTCTGCTGGCCTTTTCTATGCGTATGATCAGAATTCGAT  
CTTCCAGGTTTCTGTAATTGACGAAAGCAGAGATATGTGGAAGGTTACCTAGACTTGAAA  
GATTATGCTGCAGCTTTAGCAAAGTGTGCGTACCCTCTCCAGAGAGACCAAGTTTATTTAGT  
TCAGGCAGAAGCTGCATTTGCCAACAAGGAATATCTACGAGCAGCATCATTCTATGCCAAA  
GTCAATTATGTAATATCTTTGAAGAGGTCACCTTGAAGTTTATTAGTATAAACGAACTGGAA  
TCTTTGAGAACATTCCTGTTGCGAAAGCTTGATACTCTCTCAAAGAACGATAAATGCCAAAT  
TACGATGATATCAACATGGGCAACAGAGCTATATCTGGACAAGATAAATCGTCTGCTTTTG  
GAAGATGACACTGCTATAGAAAATCGTAACTCAGAGTATCACTCAGTCATTCAAGAATTCCA  
CTAA

**5) bra-miR403-3p  
(Brara.I05028.1; YqaJ-like viral recombinase domain (YqaJ))**

ATGAGCTATTCATTTACAGAGGCATCTTGTATGCAACATTGGCGTAAAACTGGGACCACC  
AAAGAAAGAACCGATTAACATCGAGCACATTCGCTCAAGCCATCGGGTTCTGGCCAAACCG  
TAGAGTCCAGCTCTGGTTTGAGAAAATCGGAGCGATAGAGCCGTTCTCAGGCAACGCAGC  
CACGTGCTGGACCAAGATCAAAGAGCTAGAAGCGCTCAACCGATAACCACGTTCTAACGGG  
ACACGACTTCGTCTTTCCCGAGTTCGTTACTTTAACAGAAGACGAAAACCTGGTTAGGAGCT  
TCTCCCGACGGAGACATGTACGGTTTTGGTCAGCGAGGGGTCGAAAGGTATGCTGGAAGTT  
AAGTGTCCGTACGGAGAGGGTTACCCGTGGAAGAAAGTGCCGTGGCATTACGTGCCGCA  
GGCTCAGGGTTTTGATGGAGATTGTGGGGAGAGATTGGTTGGATTTGTATTGTTGGACTGTT  
AACGGGAGTAGTTTTGTTTAGGATTGAGAGAGATTGTGTGTTTTGGCGGGAGATGAAACCGA  
CGCTTGTTGATTTTTGGGAGAGGCATGTGGTTCCCAGGTTTAGTGATAGCTCTCTTGTGAT  
AACAGATCCTTTGGTGGAGCTGGTGGAGTTTTGTGCCTGAGTCTAGACATGAACGGTGTAA  
CAGATTTTGCCTGGGACTGAGAGGGTTATGGATAACTCTTGTAAGCGTTTGTTTTATGAAAT  
TAATGGCCAAATCTTGGACTGA



**6) bra-miR824  
(Brara.K00360.1; AGAMOUS-like 16)**

ATGGGAAGGGGAAAGATCGCGATTAAGAGGATCGATAACTCGACGAGTCGTCAGGTGACT  
TTCTCCAAGAGAAGGAACGGCTTGTTGAAGAAAGCCAAGGAGCTTGCGATTCTTTGCGATG  
CTGAAGTTGGTGTATCATCTTCTCTAGTACTGGCAGGCTCTACGATTTCTCCAGCTCCAG  
CATGAAATCGGTAAATAGAGAGATACAGAGATGCCAAATGTGACACCAATTCGGAAATGAAC  
CCAGCTTCAGAACTCAAGTTTTGGCAAACGAGGCTGCGATTCTAAAGCGTCAGCTACATA  
ACTTGCAAGAAAACCCGGCAAATGATGGGTGAAGAGCTCTCTGGACTAAGTGTGGAAG  
ATCTTCAGAACTGGAGAATCAGCTTGAGATGAGCCTTCGTGACGTACGAATGAAAAAGGA  
ACAAATGTTAGTCGAAGAAATAAAGAAGTGAACCGAGAGGGTAATCTCGTGCACCAAGAG  
AATTTAGAGCTCCATAAGAAAGTAAACCTAATGCACCAGCAGCACATGGAGTTACATAAGA  
AGGTTTCAGAGGTTGAGAGTGTGAAAAGCGCAGACAAAATTTCTTTCTCACAAATGGTCT  
AGACATGGGAGGTAACCTCGAGCGAACATGTCCATCTTCAGCTCAGCCAACCCCAGCAGCA  
TGACGAAACAAGTTCCAAAGCTATCCAACCTAAGCTATTTTTCTTTCATTGCGTGA

**7) bra-miR157a  
(Brara.F03810.1; Squamosa promoter binding protein-like 2)**

ACGCTCTTTGATCTACCAAAACATCCACATGTTTGTGTAACACTACATATCAAATTGCTTTTTCT  
TAATTAATAATATCATAAAGTTTCTTTACAAATAATAAAATCATGATTTTTCTCAATAACGAA  
TGAATCGTCCAAAAAAGTTGAAGCTGGTGAAAGGCAGTTTGACCCCTCCCATCTCCCAAC  
TTGGTACTTCGCTTTCACACACATCACATGCTTCTCTCACTCTCTCTCCTCTTTTCTTCTCCC  
ACTCTTGTTCTTCTCTCTAAATGCTCTGTAAGTGTCAAGCCAAAAATGGAAGCTTTACTCC  
ATTAACGACGAGATCCTTCCCTAATTCTCTAATCAATAGGTAACCCATTTTTATTTAGACTAA  
TCCTCATAACGCTTTTTGGTTTCCCGTAAATCTTATAGCTTAGAGTAAAGATTTTTATTTACT  
TAGCTAAAAGAAAGAACTTATTTACCATAAATGGTGAGACATCCATTTGCGGCTGAGATTT  
TGCTAACTTTATTATCTCTCTCTTTCTTGATTTTTCTATTTTTCTTTTTACTACCTACACAATA  
GCATCATAATCAGAGAGGGATGGTGAGTTGAAAATGACCATTGTGTTGCATCTAGTTGATA  
AATCTAAAACCCTCAAATACCCCCACTTTCTCAAACGAAGTTAAAACAAATTTTACTCTTTT  
ACTTTAGCCCTATAGATCTCATTCCCAAAGAAAAAAGAAAACCTTTTGTGGGTTG  
TTGATGCTTTTTGGTTCATGATCTCTTATGGGTTTTGTAAGTACTGATTCTAGTGTCGGTT  
TACATATGTGTTTAGGAACCATGGAATCTTTAGTGGGTTTGTGAGTAGTAGACAAATTTTAC  
GAAATGTAATATTAAGGGGATGATTTTGACAGCTATTGAGTAGTTAATCCGCATCTATGGA  
CAGCTTTTGATAATGAAATGGTAAAGGAGGGTCCCTACTTCTTGAAGGATTATGCCCCAC  
AACTCAATGAATGTAATTATTGGTGAGCTAAAAGTTTTTTTTTTGTGATGAAAAAATGA  
GGGTGTCTTTTATTGTTCTTGTATAAATGAGAATGAACTTGTGTTGGAAAGTCAAATAAAT  
TTCTTCTCCTCAGGGTTCACCTAAGAGAGAGATCCACAAGTTTTTTTAGATTTTGGTGT  
AGTGTCTGTATGGAGTGAATGCAAAGCCATCATTGCAGTGGGAGTGGGATAATCTAATAT  
CTTTGGTACTTCATCAGCTGAAAATCTTAGAAAGCAACGACCAATGGATTGGGAAAATGAT  
GGGTTGATTGCACCACTTTTTACTCGTCCAGCTTTGCTACAGAAGCAGCTTATGGTGGTG  
GTAGTTCAGGTTCTGATCTAGCTCATGCTTTCTCTAAAAGCTCAAAGTCAACTTCCATTAGC  
TCTTCATCAGCTGAAGTGAGAACCTACAATTTACATCAGAAGCTGGTGAAAGTGTTCCCTC  
CTGGAGAATTGGGGAGCAGTGAAGAGTTTGCAATGGGAATTGATACTTCTCCAAGTCTTGA  
ACTCTCCTTCGGCTCTGGTGATCCGGTCTTGGTTTGAAGCTTGGTAAGAGGACATACTTT  
GAAGACTTTTGGGAAGTGGAGAATGCTAAAGTTTCAGCACTTCCGGTGAGCCTGGCGTCA  
TCTTCTGCTTCTCCGGTGAAGAAATCCAAAACACTCTCTCAGAAATTACAACTCCTCACTG  
CCAAGTTGAAGGCTGTAACCTCGATCTCTCCTCAGCTAAGGACTATCATCGGAAACACAGG  
ATTTGTGAAAACCATTCAAAGTTCCCTAAAGTCGTTGTAAGTGGAGTAGAGCGCCGGTTCT  
GCCAACAATGTAGCAGGTTTCACTGTCTCTGAGTTTGTGAGAAAGAAACGTAGCTGTCTG  
CCGGCGTCTCTCAGATCACAATGCAAGACGTCGCAAGCCAAATCCCGGGAGGACATATGA  
TGGGAAGCAACAGATGGATTTTGTATGGAACAGATTTGCACTTATCCATCCAAGAAGTGAA  
GAAAATTTCTGTGGCCTAATCCGAAGCCTGTACCATCAAGAGGGTTATTGCATGAACCTG  
CAAAGACCGAGATGCCCAATAAGCTTTTACCGAGCATTGTGGATTTGGATTGTTGGACCC  
CAAACGAAAACCACAGAGCTGAGTTATTCAGTAAAGATTTGTTAGAAAAGGTCACAATCT  
CTTCTTACACATGGGTGCTTCTCAAGATCTTGTGATGGTGCTCTCTCTTCTGTCAAATTCA  
ACACCATGGGTTTCTCGAACCAGCCAACACGGTTTTCCCTTAACCACCATTCCACAAGCA  
ACCTCCAACCCGTGGTTCACGGTCTGTGACTCAACTCAGTTCAGTGTCAGCTACTGGCA

GCCGGACCCACCAGCAGCTGAGGGCTCAACCGCTTTGACTAGGAATGGGGTAGGCCAGT  
TTAATGAGAACTACAACCTTGAATCAGTTTTATAACTGAAAGTGTGTTGCTTTTAAAATCATAA  
TAAGATACTTTGTGTAAGGATCAGGTGAGCCTAGTGGTAACGTTTAAATAGGAGCTGTGAA  
ACTTGCTAAAGACATCAACTCCTCTCGTCTTTCTTTGTCCATTGATTTCTTGGGTTAGGG  
AGAGTTGTGACAGTTAAGTATTATAAATCATCTTGTCAAATTATTTATACATTAGAATTTCA  
GATATTGATGGTGTAGCAACTGAAAAATT

**8) bra-miR164a/164e-5p**

**(TCONS\_00044570: gi|15222818|ref|NP\_175997.1| NAC domain-containing protein 21/22)**

TTTCTCTCTCTTCCCTCTTA ACTAATTGTCCGCTAATCAAAAAGATCATCATCAAATATTATA  
AACCTAAAATCTAACCATT CAGTGATCAAAGGATCTCAACAAAGAGAGAGAGAGAGAGGAGCA  
TGGAGTCGGAGGAGGAGAAGGAGAGTAGTATAAGCATGGTGGAGGCAAAGTTGCCCCCA  
GGATTCAGATTTACCCAAAGGACGACGAGCTTGTCTGCGATTACTTGATGGCANNNNNNN  
NNNNNNNNNNNNNNNNNNNNNNNNNNNNNNNNNNNNNNNNNNNNNNNNNNNNNNNNNNNN  
NNNNNNNNNNNNNNNNNNNNNNNNNNNNNNNNNNNNNNNNNNNNNNNNNNNNNNNNNNNN  
NNNNNTGGCAAGGATTGGTATTTCTACAGCCAGAGAGATAGGAAATACGCGACTGGGCTG  
AGAACAAACAGAGCAACGGCCACCGGATATTGGAAAGCCACAGGGAAAGACAGAGCCATT  
CTAAGAAAGGGCAAGCTTGTTGGGATGAGGAAGACATTGGTGTTTTATCAAGGTGAGCTC  
CCCGTGGTCGTAAACTGATTGGGTGATGCACGAGTTTCGTCTCCAGGGTTCCTTTGATCC  
TCCTACTCTGAACTCTCCAGAGGTACAGGANNNNNNNNNNNNNNNNNNNNGGAAGACTGGGT  
CCTGTGTAGAGTGTTCCACAAGAACACACAAGGAGACAACATGGGAAGCTGTTTTGACGA  
GACAGTCTCCGCTTCTCTTCCCTCCACTGATGGATTCTTACATCAACTTTGACCAAGAACNNN  
NNNNNNNNNNNNNNNNCCTCTTCTTACCTCGGTCATGATCAGCACTTCTTACCAATGAGCA  
AGTGCCCTGCTTCTCCAATTTGTCACAGAACCAAACCATACTCAAACCTAACCGACTCA  
GTCTCTGAACTCGAGACTCCTTGCAAGAACCCTATCCCCTTGTTCACTGGTGGTTCATCCC  
CCGCCATGCTCCCAGGGCTAGATTGTTTCAGTTCATCAGATCAGATGGTCCTCAAAGCTCT  
ACTCAGCCAGCTCACTAAGATCGATGGAGGCATTGAGGTCAAGGAATCACAAAGTTACGG  
GGAAGGGAGCTCCGAGAGCCTCTTGACCGACATTGCCATTCCAAGCACTGCTTGGAATTG  
ATGACGATGGTCGAGTGTAGTAGTGAGAGTCATTATTGCTATATTCATATTCATGATTGG  
AACTATTCTTC

**9) bra-miR172c-3p**

**(TCONS\_00050888: gj|61608335|gb|AAX47049.1| AP2-like transcriptional factor)**

TAATTCGAAGCAAAGGGTCAAGATATGCGGCTCAAGATGAACCAACAAGATTCTCTTCAT  
CCTAATGAGATTCTTGGATTGGGTCAAACCGGAATGGTTAACCATATCCCAAATTCAAATCT  
CCAATTCGGGGCAGCAGCAACATTGGTGGCGGAGGAGGATTCTCACTATTTCCGGTGGC  
TGAGAACCACCGTTTTGATGGTCCGACCACGACGAACCAAGTGTTGGCAAATGCTGCAGC  
ATCATCAGGATTCTCTCCTCATC

10) bra-miR395-3p (c70764\_g5\_i1: gi|4033353|emb|CAA11416.1| ATP sulfurylase)

GTGCTAATTGACACCTCATCAGCGAGTAGAAACGTTATTTTCAGACCAATGTCCATTCACTTA  
TCCACTAATTATTATTTTAACATTTATTTGATGTATTAATAAACGATCCACTAACTGTCTCTTA  
ATTACAAGATTTTTGATTAATCAATGTGCCTGTAAGAAACGCAACAACACGACAAACTGCAT  
CAATGGCTTCTTCAGCCGCCATCGTCCTCTCCGGTTCTCCTTTCCGATCATCACAAATCGA  
TAGCCACCGTGTCTCCCGTCATGCATCTAGATCAGCCTTCGTCGTCTCTCT  
CCGTCGACGAGGAGGTTCTCTCCGCCGCGGTCTCGCCGTTAAAGCGGCTCTGATCGAGC  
CGGACGGAGGGAAGCTCATGGACCTCGTGGTTCGAGGAATCGAAGCGGCGCGTGATGAAA  
CGCGAGGCGGAGACGGTTCCCGTAAGGATCATGCTGAGTCGCGTGGATCTCGAGTGGGT  
GCACGTGCTCAGCGAAGGCTGGGCGAGCCCGCTAAAGGGCTTCATGAGACAGTCAGAGT  
TCCTCCAACAACACTTCATTTCAACTCGATCCGGCTCGAAGACGGCTCCGTCGTCAACATGTC  
GGTTCCGATCGTTCTCGCGATCGACGACGACCAGAAGAGTCGCATCGGCGATTCCGACCG  
AGTCACGCTCGTTGACTCGTCTGGTAACCCTGTCCGCATCCTCAGCGACATCGAGATTTAC  
AAGCACCCCTAAAGAAGAACGTATAGCAAGAACCTGGGGAACAACGGCTCCAGGTCTTCCT  
TACGCAGAAGAAGCAATCACCAGATCAGGAAACTGGTTGATCGGGGGTGATTTACAAGTC  
CTGGAGCCGATCAAGTACAACGATGGACTTGACCGGTTCCGTCTGTCTCCGTCTCAGCTC  
CGAGAGGAGTTCACAAAGCGTGACGCGGACGCTGTTTTCGCGTTCCAGCTTAGGAACCCG  
GTACACAATGGTCACGCCCTTCTCATGACCGATACTCGAAGAAGACTTCTCGAGATGGGTT  
ACAAAAACCCTGTCTTGTTGCTGAATCCACTTGGTGGATTCACTAAAGCCGATGATGTACCT  
CTCAGCTGGCGTATGAGGCAGCACGAGAAGGTGCTTGAGGACGGTGTCTTGATCCAGAG  
ACAACAGTGGTTTTGATATTCCCGTCTCCTATGCATTACGCTGGTCCAACAGAAGTGCAGT  
GGCACGCAAAGGCTAGAATCAACGCCGGTGCTAACTTTTACATTGTGGGTTCGTGATCCAG  
CCGGGATGGGTACCCAGTTGAAAAACGTGATCTTTACGATGCTGATCATGGAAAGAAAGT  
ACTAAGCATGGC

11) **bra-miR158-5p**

**(Brara.C04365.1: Arabidopsis protein of unknown function (DUF241))**

ATGGCTGCAACCTACCACGTTCCGGTCTTGTAGCTTACCCGCTCGTCTACCCTCAAATGGTC  
TCAACCATATTCAGCAACTTCTCAGTAAGCTTCCTACAGATAACAACAATAGCCTATCACTT  
CTCTCACAGCTCTATGAATCCATCTCTCATCTCTTCAACGACTCACCAGCTTCATCACTACT  
CCCTCATCACTCTTTCTTCACCCATCTTCTTGATCTTTCCCTTGTACACCTTGACTTGTGCTC  
CAAGCTACGAGACATAACTTGCCGCATCAAGGATTGTCTCCGAGACCTTCGGTCTGCTTTC  
AGACGGAGGGGACACGGTGGAGATTTTACGATCCGATGTCACGTTAAAGCCTTTGTACGC  
TCTCGACGACTGATTCACAAGGATCTTGCTAAGCTCCTCTTATTGCTCAAACAAACAGATCA  
TCCTTCCATCGAGTCAACTCATCCCTTGATCACACTTCTCCGACAAGTATGTTCCCAAACAT  
GTCGTTCCCTTTAGGACAGTCATGTTGTCCTTATCCTCATCAGTACCAAACCCAGGCCTTCC  
AGATGGGCTCTAGTTTCTAAACTGGTGATCAAGAACGTTACTAATAACAAGTGCTCAAGTTCA  
TAGCGGAGACAGAACCGAGTTCCAGATGATGGACGAAGAGCTGCAAAGATTCTGTTTCAGC  
GAAAGAGATAAAGAAGGAAGGAATCAAGTCTTTGATCGCCCTCTTGGATAACGTAGATGTT  
GTAGTTGAAGATCTAGAGGAATCGCTTGAAAGCGTGTACAGGCGTATGATCCAAGCCAGA  
GTCTCTCTTTTGAACATACTCTCTTTGCATATATAG

12) bra-miR161-3p  
(TCONS\_00015119: gi|297797589|ref|XP\_002866679.1| Pentatricopeptide repeat-containing protein)

CCCAGTTGTCTCAAAGATACAGGATTTCTGGGATGAAAGCCTGGATCATGGTTTTGACCCT  
TATTGTATAATCTGTAGCACTATGACAGGAAAACGAAGCTACTAGCAATAAGCTCAAGTCGA  
CTCGCATCCCCAAAAAAGAACCTGAAATTCCATAGGTCTGCACTAGCCTCTAACAATAACC  
CCTTACGTGCTATCAGGAGGTCTTCCGTTAGCAGTTCATATGTATGAGAGCTAAACTTGC  
AGCCACTTTCCTCCATAACGGCGAACAGTTCCTAAACGCCTCCACCAGTCCCTGCTTCCC  
AACACNNNNNNNNNNNNNNNNNNNNNNNNNNNNNNNNNNNNNNNTAACGATCTTCCAAGCTATCT  
CATCATGATAATAACCACACCGAAGCAAATTCTTAAAACCCAAGCCCCTCTCTCGCTTCT  
CCGCTTTTATACAGCCCACATATCAAGATTTTGAAGACTCTAGTTGCGGTATGTGACCAAC  
ACAGATCATATCATCTACAACCTTTGCTGCTTCTTAAACATTTCCAGCTTGCAGCAACAGC  
TAAGAAAAGCACTGAAAGTGGACTCACTCGGTGATACTCCTTCTCCTGTTGCATGCGCTC  
AAGCACCTTTTGTGCAACTCTGAGATTCCAGTTTTCGAGATCCCTTTGATCAGCATCTCAT  
AGGATTTGGCGTTGGGAGTAACACCGTGTCTACCATTTTGTCAAGAAGCTCAACAACAAT  
GTCAAACCTCAATCNNNNNNNNNNNNNNNNNNNNNNNTATTAGCCGTGAGACAGAGATCGCTCTC  
TTTTCCATGTTTCATCTCTACCAGATGTTTGTGATCAGAGCCAGAAACGTATGCTGAGAAGGCT  
CACAACCATCATCAAGCATACTTTAGAACATCAAATGCAGAATCTGTCAGCCCTTGATCG  
CCATAACCTTTAATCAGAGATGAATAAGTGTGGAATCTGGGAAAACACCATCCTCCTTCAT  
CTTCCCACATCATATCCTCAGCTTCTTTCAGTTTCCCTGCGCTACAATAGCTTTGAATGAACG  
TTGTGTAGGTATGCGCATCAGGCTTTGCTCCAGATAACAACATTTCTGAAAACGTCTCTC  
GGCATGATCAAATCCCCTTCTTTCAGCATTCTATGAATCAAGATTGTCTCAGTAATGACTG  
TAGTCTGCACACCCTTCTCAACCATTTTCTTCTCTAACAACATGGCTTCACTCAATTTTCCAT  
CGGTGCATAAGCCATGAATCAGGGCGTTAAAAGTGGACGAGTTTGGCAAGCAACTCTTGC  
TTAACATTTTCTCAAGGATAAGTTTAGCTTCTTCTAGTTTATCTGACTTGCAGTATCCATCAA  
TCANNNNNNNNNNNNNNNNNNNNNNGTGCAGTGTACATCACCACATTTGCATCTACTACACCT  
TTCTCCTCGAGAGAATCAAACAGTTCGCGAGCTTCTTCTACTTTTTTCTTTTACACAAAGA  
ATCTATGAAACTGTTATAAGTCCANNNNNNNNNNNNNNNNNNNNNNNNNNNNNNNNNNNNN  
NNNNNNNNNNNNNNNNNNNNNNNNNNNNNACCAAGCAACCTATATGCACTATCGAAATTACCAGA  
CCTACACTGCGCATCAATTAATGAGTTGTAAGTGACAACACTAGGAGCCACTCTGCGCTCA  
ACCATCTTATGAAACACTCCCATCGCTTTGTGCACATTCTTCTACAGAACCATGTATCAG  
CTCATTGTAAGTGCAGTGTATTCCGACTCACGTTACGCGATTCCATCAACTCCACAACGTCT  
AGCGCGTCTTCCNNNNNNNNNNNNNNNNNNNNNNNNNNNNNNNNNNNNNNNNNNNNNNNN  
NNNNNNNNCTGCTCACAATACCCATTAATCAGTGCATTGTAAGTGAATGACTACATTCCGGCACCAA  
CCCTTTCTCCACCATATCACCAAGCAACTCCCTCGCTTCTCCTCGAACTTACGTTCACTGCAA  
GAACTACTAATAAGCACCGTGTAAAGTGTGAATATTGGGTGTAATGCCTTTCTCCGACATCTC  
CTTACGCAGGTCAAGAGCTTCTGACTTCCGTTTCGATCCACACAGAGCGTTTATAAGCACC  
GTGTAAGTACGAACCGTTGGATAACAGTTATCCTCCTCCTTCATTTTCCCAAACAAGTCCAT  
CGCTTCATCGACCCTCCTCGCTACACAAAGCCCGTGTATAAGATGAGTGTACGCAACCTCG  
TTCCTTCTAAAACCTTTTCGAAGCCATCTCCTCGAAAACCTTAAAAGCAGAGTCCAANNNNN  
NNNNNNNNNNNNNNNNNNNNNNNNNNNNNNNNNNNNNNNNNNNNNNNAATACCCCATGATCAA  
GACGTATCCGTGAAGAAATCAGGTTCCAATCCAGCTTCAACGATCTTACTCACATACCGCT  
TCGCCGTAACCACATTCCCCACCTTGAATACCCAAAGACCATCTTGTTATAAGTGTAACG  
TTCGGAGAAACCTTATCATCCTCCATCATTTCATATAAAGCTTCTCCATTTTCATCAACCATT



**13) bra-miR391-3p  
(TCONS\_00063918: gj|297810021|ref|XP\_002872894.1| Pentatricopeptide repeat-containing protein)**

GCTTGCTGGTGGTGGCTTCTGAAGGACCAGACCCGAGAGAAGTAGAGCTCTACGTGGAAGA  
GATACTGTCTCTGATGCAGTTAGGTGAGGATTATACAGAGTTCATGGTTTCAAAGATCAAGT  
CTTTGACGTCAGTTGATGCTGAGTTGTTGCCAAGGGCTACGAAGGCGTTTAGAAATGGTAG  
CTTTAGCAAAGTGATTCAGGACGTGACGGGATTCNNNNNNNNNNNNNNNNNNNNNNNNNNNN  
NNNNNNNNNNNNNNNNNNNNNNNNNNNNNNNNNNNNNNNNNNNNNNNNNNNNNNNNNNNN  
NNNNNNNNNNNNNNNNNNNNNNNNNNNNNNNNNNNNNNNNNNNNNNNNNNNNNNNNNNNN  
NNNNNNNNNNNNNNNNNNNNNNNNNNNNNNNNNNNNNNNNNNNNNNNNNNNNNNNNNNNN  
TACGTGTTGCAGAGTTGTCTGAGGAGAGCGATTTGACTTCGAACATCAGCTCTGTGATTG  
CTGTGTTGAGCAATGCTGGTAGCTTGTGGCTAATGATTACCATGAAGCTTTGCAGCAGAA  
GATCAGAGAGCCTAACCTTGGTGCTAGGTTGTTCTTGGGTGGTATCGGTGTGGAGAACAC  
TGGAAGTGAAGTTCGAACTGCTTTGAACAATATGGATGTGAGCTGCGAGTACATTCTTAAA  
CTCAAACACGAAATCGAGGAGCAATGTAAGTGGTGTTCCTGCACCAGCAGATAGAGAG  
AGGATAAAGTCATGTCTATCCGAGCTAGGCGAGTTAAGCAACACGTTCAAGCAGNNNNNN  
NNNNNNNNNNNNNTTACTCAACTCTGGCATGGAACAGCTAGTAGCAACCGTAACTCCAAGAAT  
CCGTCCGGTTCTAGACACTGTAGCTACCATAAGCTACGAGCTGACAGAAACAGAGTACGC  
AGAGAACGAGNNNNNNNNNNNNNNNNNNNNNNNNNNNNNNNNNNNNNNNNNNNNNNNNNN  
NNACTTCTCCACTCGGTGGAAACAAACGCTGCGTGGCTCCAACCGCTAATGACTTCAAACA  
ACTACGACTCGTTTCTGCATCTCATAATAGATTTATAGTGAAGAGACTTGAAGTGATAATG  
ATGCAGAAACGGTTTAGCCAGCTTGGTGGNNNNNNNNNNNNNNNNNNNNNGCTTCAGCTAGACCG  
AGACACGAGGGCTTTGGTTAGCCATTTCTCGGGTATGACTCAGAGAACAGTGAGAGATAAA  
TTCGCTCGGTAACTCAAATGGCGACGATACTGAACTTGGAGAAGGTCTCAGAGATTTTGG  
ACTTCTGGGGAGAGAACTCAGGACCTATGACTTGGAGACTTACCCCTGCTGAGGTTAGAC  
GGGTCTTGGGTCTTCGGGTTCGAGTTTAAAGCCGAATCTATTGCTGCTCTCAAGTTGTGATG  
TTACTTTCCTCTTTTATTTATGTTGTCAACCCACATATTACTCTGTTGCTGTATAACTTGTATT  
GCCCATAGTGCATGATCAACGG

14) **bra-miR396-3p**

**(Brara.I02082.1: PHOSPHATE TRANSPORTER PHO1 HOMOLOG 2-RELATED)**

ATGAAATTCGGAAAAGAATTTTCTTCACAGATGGTGCCTGAGTGGCAGCAGGCTTACGTGG  
ACTACAAGTATCTCAAACCCCTAATCAAAGATATCAACCGCTTCAAATGCAAACCAATCCT  
CAAGGCCATGAGATGAAAACGGCTCTGCACCCGCACATTCATCGGTCAAAGAGACATGGC  
TTTGGCAGCGGTTGCGGTCAGATCAGCCCTTCTTCGACAGTGGTCGACATTAACGACGGA  
ATAACGACGGCGCCAATTCATGTGAGTTCTTCGGTGACTCACCAGTACGAGACGACGTTTT  
TTATGACGGCGGAGAGAGGAGAGATGAGTTGGTGTTTTTCCGGCGACTAGACGACC  
AGTTCAACAAAGTGGAGAAGTTCTATAAAGAGAAAGCTGATGAAGTGGTGAAGAAGCGGA  
GGTGTCTAACAAACAGATGGATGCGCTGATCGCGTTTTCGGTTTAAGATGAAGGAGGAGCG  
TACGGCGGAGATGACTCTCATGGCCTCACCTAATGCGGTTTTCTCCGGCGGAGCTCGCCAA  
AACGTCTACTCAATCTCCACGGGAGTCATAGAGGAAGGAGGCTCCAGTGGAGCTGGTCCG  
ATCCGATGAAAATGACAATAACGTTGAGAAAGACAGTTATAGCAAACAACACTCAAACCG  
GCCAATGACATGAGCAAGATGAAAGATACGACGAGACCAGCTTCGATGGGAGTTCTAAACT  
CCGTCAGGATCAGCTACACTAAGGGAACGCCTAGTTCCACCATTAAAAGCGTTCTCAAAGT  
CTCGAACGAGCCAGAGCTCACATTAACAGATATAATTTAAGGAAAATCGAGGAGAAGCTA  
AGATGTGCGTTCGTAGAGTTTTATCGGAAACTATGGTTTCTTAAAAGCTATAGCTTTTTGAA  
TGTGTTGGCGCTTTCGAAGATATTGAAGAAGTATGATAAGGTAACCTCGAGGGATGCTGCG  
AAGTCTTACATGACAATGGTTGATAACTCTTGCCCTTGGAAAGCTCTGATGAGGTTATGAGACT  
CCTTGATCATGTTGAAACTACATTCATAAAGCATTTCACAAATGGCAACAGAACAAAAGGAA  
TCAACATCTTGCAACCTAAAGCTAAAAGAGAGAGACACCGACTTACATTTCCACAGGTTTT  
TTGGGTGGATGCATGTTTTCCCTCGTTGTGGCTCTTGTGCTATCGTTTCGCACCCGAAACA  
TCTTACAAGATGAACGCCAGGAACAGTACATGAACTCAATGTTTCTTTATAGCTTGTTTC  
GGATTCATCGTGTTGCACATAATTATGTATGCTGCTAATATTTATTTTTGGAGGCGGTATGG  
AGTAAACTATTCCTTCATATTTGGATTCAAACAAGGAAATGAACTCGGCTACAAACAATAAC  
TATTCGTGGGATTCAGCATTGGTGCCTTGCCTTCTTTGTGTCCTTGCCAATCTTGACAT  
GGAGACAAACCCCAAACTAAAGATTACCAAGCATTAACTGAACTCCTTCCTCTTTGCCTCC  
TCATTACTATGCTCATAGTTCTAATCCTACCATTCAACATTTTCTATCGATCAAGTCGCTACT  
TCTTTCTCAATTGCCTATCTCGCATTCTTGCTGCTCCTCTTTGCAAGGTGACATTATCCGAT  
TTCTTCTTGGCAGATCAATTATGTAGCCAAGCGCAAACACTTTCGAAGCATTCAATTTCTACAT  
ATGTTACTACGGTTGGGGAGACTTCAAACAAAGGCAAACACTTGTAGAGAGTCACGAGTC  
TTCAACACTTTTCTTATTCATTGCTGCTGCCTTCCATTCTGTTTCTCGCTTCTTCAGTGCATG  
AGGCGAGTGTGTTGAAGAGAGAAAACATTGAACAAGGGTATAATAGTTTCAAGTACTTTTTAGT  
AGTAGTTGCTGTTTGTAGGGATGGCTTATGAAGTTGATCGAAAGAAAGATAGTCAAACATA  
TCTGGAGATGGTCAGGTGGGGTACTTCTGCCATGGCTGTGGTTTTCTGTACGTACTGGGA  
CTTGGTTCAAGACTGGGGACTTCTTAACCGAACATCCAAGAATCCGTGGCTACGTGATGAA  
CTCCTAGTACCCCAAAAGAAGTTTACTTTCATTGCCATGATCTTGAACGTGGTGTGAGATT  
TGCGTGGCTGCAAACAGTGCTAGATTTACAATTTGAATCAATTAACACACAGGCGGCGATT  
GCCTTTGTTGCAAGTCTTGAGATCATTGCTCGTGGGATATGGAATTTCTTCAGGTTGGAGA  
ACGAACATTTAAACAATGTCGGGAAGTTTAGAGCTTTCAAGACAGTTTCATTACCATTCAAC  
TACGAGGAAGACCAAAAAATATTATGTGGCCTTAATTAG

15) bra-miR9555a-3p

(Brara.B01903.1: Leucine-rich repeat transmembrane protein kinase)

ATGCCTAGATTACGACGGCCTCCGTGTCTACTACTCACTGTCTGGTTCTTGTGTATTTACAG  
TTTGGTTCACGTCTGTTTCGAGCTCAAACCCGAACCGGAACCTACTCATCCGGACGACGCG  
CGTGCGCTGAACTCGATTTTCGCGACTTGAAGATCAATGCGTGAATGATTGGAACATCA  
GCGGCGAGCTTTGCTCCGGCGCCGCCACAAACGGCAATGTCGACGTGATGACCCTGCC  
TACAACCCTATAATCAAATGCGCGTGTACTTTCGCCAACTCCACCTGCCGCATCACCCGCAC  
TGAAGGTTTATTCAAAGATGTTGTAGGAACTATACCTGATGAGCTATGGACTTTGGAACAC  
CTCACCAATCTGAACTTGGGTCAAACCTTGTCTGACAGGACCCTTGTCTCCTGCAATTGGGA  
ACCTCACTCGAATGGAATGGATGACATTTGGGATCAATGCGTTGTCTGCTGAAATTGGGAG  
TTGTACAAAGCTACAGCAAATCTACATAGATAGTTCTGGGCTTAGCGGGGAAATACCTTTAT  
CATTTGCTAACCTCGTGGAGCTGCAACAAGCCTGGATGATGGATCTGGAAGTTACAGGTC  
GGATACCAGACTTTATTGAAACTGGACCAAACCTTACTGTCTTGAGAATTGTTGAACTGGT  
TTGAGTGGTCCGATACCGTCGTCATTTTCCAACCTTAACTTCTTTGACAGAACTGAGGCTAG  
GAGATATATCCAATGGAAGCTCTTCTCTTGAATTCATCAAAGACATGAAAAATCTAAGTATAT  
TAGTATTGAGGAACAGCAATCTCACGGGGGAAATACCATCTGATATTGGAGAATACTCAAG  
CTTGAGCGTAGTTGATTTAAGCTTCAACAAATTACATGGACCAATACCGTCTTCACTTCTCA  
ATTTAACTTCACTTATTTCACTTGTCTTAGGAAACAACACGTTGAATGGTTCCTTGCCCACTC  
AAAAGAGTCAGTCTTTGAGCAATATAGATGTGTCTGACAAATAATTTGTCTGGAAGTCTTCT  
TCGTGGGTCAGCTTACCAAACCTCGAATTTCAACCTAGTTGCTAACAGCTTTACACTGGAAG  
GTCTTGACAACAGGGTTTTATCAGGACTGAACTGTCTGCAGAAGAAGTCCGTTGCAGTGG  
AGGCAAAGGAATCTATTACAACCTTTTCAATCAACTGCGGAGGCCCGGATATAACGTCTGTT  
AGTGGGGCACTATATGACAAAGATGACGCGGATCTTGACCATCTTCGTTTTTTCGTGAATG  
CTGCTAGGAGATGGGCAGTTAGTAGCATTGGTCTCTTTGCCGGAAGTAGCAATAATAGATA  
TATAGAAACTTTACTATCACAATTTACCAACACTTCAGACTCAGAGCTTTTTTCAGACAGCAA  
ACTTTCTCCATCTTCCATAAGATATTATGGTCTGGAGCTCGAAAATGGAGTCTATAACGTCA  
CACTTCAGTTTGTGAAATACAAATGACAAGTTCTAACTCTTGGACAGGGCTTGGAAAGACG  
GAGATTTGACATTTATGTCCAGGGAAAGACTTGTGGAAAAGGATTTTGTATGTACGCAGAACA  
GCTGGTGGCTTCACTGACAGGGCAGTTTCGTAGAGAATATAAAGCAAATGTGACAGAAAATT  
ACCTCGAAGTTCATCTTTCTGGGCTGGAAAAGGAACATGTTGTATTCTTACAGGGTGTCT  
TATGGGCTATAATATCGGCAGTCAGTGCAGCGGCAGATTTTACACCAACTGTGAGTAATA  
AGCCACCATCAAAGAAAATAATAGGACTGGTGTGATTGTCGGTGTGATTGTTGGCGTAGG  
ACTTTTTAGCTTCTTTCGGGGCGTTGTTATCTTCAACAATACGACAAAGAAGAAAGCCATACA  
CTGATGATGAAGAACTGCTTAGTATGGAATAAAGCCTTACACATTTACTTACTCAGAACTT  
AAAAGTGCAACTCAAGATTTCAATCTCTCAAACAAGCTCGGAGAGGGTGGATTTGGGCCTG  
TTTATAAAGGAAACCTCAAAGATGGAAGAGAGGTAGCTGTGAAGTTGTTGTCTGTTGGATC  
TCGGCAAGGGAAAGGACAATTTGTTGCAGAAATTGTAACAATTTCTACAGTTCTACATCGAA  
ACCTTGTGACTCTTTACGGCTGCTGCTTTGAAGGAGATCATCGTTTGCTCGTATATGAGTAT  
CTCCCTAATGGAAGTCTCGATCAGGCACTATTTGGGGAAAAGAGTTTACATCTTGATTGGT  
CAACACGTTTTCGAGATATGCTTGGGAGTAGCCAGAGGACTAGTCTATCTCCACGAGGAGG  
CGAGGGTTCGCATTGTACACAGGGATGTGAAGGCCAGCAACATTTTGTAGACTCCGAAC  
TGGTCCCAAAGTTTCTGATTTTGGGCTGGCGAAACTATACCATGGCAAGAAAACCTCACAT  
AAGTACCGGAGTTGCAGGGACCATAGGCTATCTTGCGCCAGAGTATGCAATGCGTGGACA  
TCTGACAGAGAAAACAGATGTGTATGCATTTGGTGTGTTGGCTCTTGAGCTAGTTAGTGGA  
AGGCCAAACTCTGATGAGATCTTAGATGATGAGAAAAAATATCTTCTTGAATGGGCATGGA  
ATCTACACGAGAAAGGTCGTGAAGTTGAACTGATAGATGATAGGCTAAGTGAATTCATGT  
GGAAGAAGTGAACGAGTGATTGGCGTTGCTCTGCTATGCACACAAGCATCTCATTCTTG  
AGACCACCTATGTCACGAGTAGTGGCCCTGTTGTCAGGAGATGTTGAGGTCAGTGATGTC

ACTTCTAAGCCAGGCTACCTAACCGATTGGAGATTTGATGACATCACCAGAGATGTTGAGG  
TCAGTCATGTCACTTTCGAGCCAGGCTATCTAACCGACTGGAGATTTGATGACATCACCAC  
TTCCTCTCTCAGAAGCTTTCAAACCACAGAGACGAACACTTCTGGCTCCAAGATTTCACCC  
CGAAAAGCCGACTCTGAGCCGATGCTTGGAGCCCAAGATCAGTTTTGGAAGAGAACAATG  
TCTTCTCTGA

16) bra-miR164a/164e-5p

(TCONS\_00044570: gj|15222818|ref|NP\_175997.1| NAC domain-containing protein 21/22)

TTTCTCTCTCTTTCCCTCTTAACTAATTGTCCGCTAATCAAAAAGATCATCATCAAATATTATA  
AACCTAAAATCTAACCATTCAAGTATCAAAGGATCTCAACAAAGAGAGAGAGAGAGAGGAGCA  
TGGAGTCGGAGGAGGAGAAGGAGAGTAGTATAAGCATGGTGGAGGGCAAAGTTGCCCCCA  
GGATTCAGATTTACCCAAAGGACGACGAGCTTGTCTGCGATTACTTGATGGCANNNNNNNN  
NNNNNNNNNNNNNNNNNNNNNNNNNNNNNNNNNNNNNNNNNNNNNNNNNNNNNNNNNNNN  
NNNNNNNNNNNNNNNNNNNNNNNNNNNNNNNNNNNNNNNNNNNNNNNNNNNNNNNNNNNN  
NNNNNTGGCAAGGATTGGTATTTCTACAGCCAGAGAGATAGGAAATACGCGACTGGGCTG  
AGAACAAACAGAGCAACGGCCACCGGATATTGGAAAGCCACAGGGAAAGACAGAGCCATT  
CTAAGAAAGGGCAAGCTTGTTGGGATGAGGAAGACATTGGTGTTTTATCAAGGTGAGCTC  
CCCGTGGTCGTAAAACCTGATTGGGTCATGCACGAGTTTCGTCTCCAGGGTTCCTTTGATCC  
TCCTACTCTGAACTCTCCAGAGGTACAGGANNNNNNNNNNNNNNNNNNNNNNGGAAGACTGGGT  
CCTGTGTAGAGTGTTCCACAAGAACACACAAGGAGACAACATGGGAAGCTGTTTTGACGA  
GACAGTCTCCGCTTCTCTTCCCTCCACTGATGGATTCTTACATCAACTTTGACCAAGAACNNN  
NNNNNNNNNNNNNNNNCCTCTTCTTACCTCGGTCATGATCAGCACTTCTTACCAATGAGCA  
AGTGCCCTGCTTCTCCAATTTGTACAGAACCAAACCATACTCAAACCTAACCGACTCA  
GTCTCTGAACTCGAGACTCCTTGCAAGAACCCTATCCCCTTGTTCACTGGTGGTTCATCCC  
CCGCCATGCTCCCAGGGCTAGATTGTTTCAGTTCATCAGATCAGATGGTCCTCAAAGCTCT  
ACTCAGCCAGCTCACTAAGATCGATGGAGGCATTGAGGTCAAGGAATCACAAAGTTACGG  
GGAAGGGAGCTCCGAGAGCCTCTTGACCGACATTGCCATTCCAAGCACTGCTTGGAATTG  
ATGACGATGGTCGAGTGTAGTAGTGAGAGTCATTATTGCTATATTCATATTCATGATTGG  
AACTATTCTTC

17) bra-miR395a-3p=bra-miR395b-3p=bra-miR395c-3p=bra-miR395d-3p  
(c70764\_g5\_i1: gj|4033353|emb|CAA11416.1| ATP sulfurylase)

GTGCTAATTGACACCTCATCAGCGAGTAGAAACGTTATTTTCAGACCAATGTCCATTCACTTA  
TCCACTAATTATTATTTTAACATTTATTTGATGTATTAATAAACGATCCACTAACTGTCTCTTA  
ATTACAAGATTTTTGATTAATCAATGTGCCTGTAAGAAACGCAACAACACGACAAACTGCAT  
CAATGGCTTCTTCAGCCGCCATCGTCCTCTCCGGTTCTCCTTTCCGATCATCACAAATCGA  
TAGCCACCGTGTCTCCCGTCATGCATCTAGATCAGCCTTCGTCGTCTCTCT  
CCGTCGACGAGGAGTTCTCTCCGCCGCGGTCTCGCCGTTAAAGCGGCTCTGATCGAGC  
CGGACGGAGGGAAGCTCATGGACCTCGTGGTTCGAGGAATCGAAGCGGCGCGTGATGAAA  
CGCGAGGCGGAGACGGTTCCCGTAAGGATCATGCTGAGTCGCGTGGATCTCGAGTGGGT  
GCACGTGCTCAGCGAAGGCTGGGCGAGCCCGCTAAAGGGCTTCATGAGACAGTCAGAGT  
TCCTCCAAACACTTCATTTCAACTCGATCCGGCTCGAAGACGGCTCCGTCGTCAACATGTC  
GGTTCCGATCGTTCTCGCGATCGACGACGACCAGAAGAGTCGCATCGGCGATTCCGACCG  
AGTCACGCTCGTTGACTCGTCTGGTAACCCTGTCGCCATCCTCAGCGACATCGAGATTTAC  
AAGCACCTAAAGAAGAACGTATAGCAAGAACCTGGGGAACAACGGCTCCAGGTCTTCCT  
TACGCAGAAGAAGCAATCACCAGATCAGGAAACTGGTTGATCGGGGGTGATTTACAAGTC  
CTGGAGCCGATCAAGTACAACGATGGACTTGACCGGTTCCGTCTGTCTCCGTCTCAGCTC  
CGAGAGGAGTTCACAAAGCGTGACGCGGACGCTGTTTTCGCGTTCCAGCTTAGGAACCCG  
GTACACAATGGTCACGCCCTTCTCATGACCGATACTCGAAGAAGACTTCTCGAGATGGGTT  
ACAAAAACCCTGTCTTGTTGCTGAATCCACTTGGTGGATTCACTAAAGCCGATGATGTACCT  
CTCAGCTGGCGTATGAGGCAGCACGAGAAGGTGCTTGAGGACGGTGTTCTTGATCCAGAG  
ACAACAGTGGTTTCGATATTCCCGTCTCCTATGCATTACGCTGGTCCAACAGAAGTGCAGT  
GGCACGCAAAGGCTAGAATCAACGCCGGTGCTAACTTTTACATTGTGGGTTCGTGATCCAG  
CCGGGATGGGTACCCAGTTGAAAACGTGATCTTTACGATGCTGATCATGGAAAGAAAGT  
ACTAAGCATGGC

18) **bra-miR403-5p (Brara.I03870.1; Plant protein of unknown function (DUF827))**

CACAATGATAGCGAATCACTAGTTCAAGAGCTCTTTTCTTTATAATGTCTCCTTCTGCGCAG  
TAACTATGATTACTGTGATGAGCTTCTCTTTAAATTTTCTTTACCTTTTGAGTTTTGACAAAC  
CATTTTGTTGTTCTTGAGGCTGAGAATGGCTGAGAGGAGGCTTCAAAGAACCCTGCGGC  
GGAGGCCATTCCCGGTACACCGAGAATCCGGGATGTGAGAATCGTATCTGGGTCCGAGGT  
AACCGGATTATGTAGTCGTGGGTCTTCTCGGGTTCCATTCAAACCTCAAAGACAATTACGAC  
GGTGTGGGAGAATATGACCTAAATAAAATGGAAGAAAAAGCAGCAAAGCTTGAGAAGGATC  
TAATCATGAAAGAGTTAGAACTCTAGATTTTCTAGAAGCTCTTGGATCAACAAAAAAGATC  
GTGAAAGACTTGAAGCTGGAGCTGCAGCAGCAACAACCCATGAGATGCATGGAGAGCCCT  
GAACATCTTCGTTCCAGAAATCAAAGAGATGAACCATGATGAACGTTGCCATCGTACTCCA  
TGAGGTCTCCAGATATGATCTTCATGGAAGCAAGCCAATATGAATCTTGGTAAAC  
CATGGATGATCTTTCGATGATACGATCCTACGTTGAATCTTTGAATATGAATACGGTGGAAAC  
ATAAAGATTTTCTTGGGGTGGCGTCTCTAGCTGAGGAGCTCAACAGTTTGAGGTTAAACA  
TGATGATGAAGAGAGATTACCAAGAATGTATCCGTGAACCCGCAGTGCGAACAAGTT  
AAGATGGTTGTTGAAACCAATGATAACAAGCAGAGCAGCACATGTCTTAAAACCGCAAGAA  
TGAGATTGGTTGCTGCAAGAAAAATGGAGGAAGCAGCTAGAGCAGCGGAAGCACTTGCGA  
TTGCTGAAATGACCATGCTATCCAGTGCCAAAGACCAAGACGAGTTTTGCTTCCCAGAGCC  
ACCAAGGTCACCTTTAACACTCAAAGAACAATGCAAGAAGACATATCCATTGAGATCATGA  
GGAAGCTGGAGGAAGCTAATGAAGAAGTTAAACAAAGCCAACAAGCCTTAGAAACTGCGTT  
AAACCGGGTGGAAATTGCTAACGTGAAGCAACTTGAAGCAGAAGATGCGGTTCCGAGTG  
GAACATTGAGTCATGGAAAGATCAGAAAGCTATTAAGCAAAGCGGTCCATGAAAGATGAT  
AACATTCCTCGACGCTCCTTCTTGAGCCATGTGAGCCAGCACGAGCCGCTTGACAATCTCG  
CTAAGCCGATGCTAAAACGTAATGTTTCAGTCGGCAGTGGCCTAAACCGGAAACAAGTCCC  
TAACACTGATGAGAAACATTTGAGGAGAAAGTTTAGATTATGCACAACACGGTTCCTGAA  
CAGACAGAGTAAGCAAACACAGCCTTTAATGAATGAAAACATGTTTTGCTCATTTCATTT  
CGTTTTTTTTTAATTATCTTTTGTCTAATTCGTTTGATCATATATGAGTGTTGTTGCTTCT  
ATTATAAACAAACCATAATGATTATTGTGAAATGTGTCGTCTTGATGCAA

19) bra-miR5725 (c68837\_g4\_i12; gi|297793391|ref|XP\_002864580.1| Kinase family protein)

ATCCTTACAGATACCGAGCTGCTGTCCTGATGGATGATCAGAGAGAGACAGAAGCAGTGG  
AAGAGCTGTCAAAGGCTATAGCTTTTCAGACCGGAACTGCAAACGCTGCATCTCAGAGCAG  
CGTTCCACGAGGCTACAGGGAAGCTTTTCATTGGCTGCGCAAGACTGCGAAGCTGCTCTCT  
GTTTGGACCCTAACACACGAGACGCTTCATCTCTACAGCAGATCCAAGGATCAAGCTTC  
ATCCATTGACAACACCATTGCTGGCTTAGATTAGTTCTAAGTGACATTTGGGTATCTAGAGG  
GCACACCTAAACGGCAGGCTCCTTTCTCTTTAGTTTCCATCTGTGGTTATGATCTCCATCTC  
ACTCCACCACCGTGGAGATAGCCTTGGCAGTGTGCATCGGCTTCTATTCCAATGATCTCT  
CTCAACTTCACCACAACCTTTCTCATCGTTGGCCGTTGAGCTGAGTATGGATTCATACACTG  
CCTAACCACTCCCAACAACCTCTCAGCAACATCCTCCTGAAACGTTTTTCAGCGTCGGGTCT  
ACAAGATCTCTCGCGGGCTTGGGTTCAAGAAACAAAGAATCAGGGTCTGGGAGCCTCCCG  
GTGATGATTTCAAACACAAGGGCGCCAAAGTTTAAGACGTTGGTTTGTGGGTCAAGCGTTG  
AGTGGTCTAAAAGGTTCTTGCTCGAGGAGGATTCTTGGAGGGTGAGATGAAGTTGAGGA  
CTGAAAAGTCTGAGACTTTGGCGGCGTTGTCTTCGGTTAAGTAGATAACAAGAGGAGTCCAG  
ATTGGTGTGCAAGATGGGTGGGTTGAGGTTGTGCATGTGCTCTAGACAGTAAGCTATTCCC  
ATGAAGATTCTGAGTCTTGTAGGCCAGTCCAAGTGTCCGTATGTTGAGCTTTCATGAAAA  
AGATCAGTTCAACAGTTTATAGATCAGATTGTGTTAAGTTAATAAAAAGAGTTTCTTGATGAT  
GATGGAGTACTTACAGTGAAGATGCTCGGAGAGGGATCCATTAGGAGCGTATTCGAAAAC  
AAGCATTCTGTGGAAAGGCTCGTTCTCATGGCAATACCCAATCACATTCAGAAAATTCTTGT  
GGTCTACTTTGGCTAACTTACGTATCTTTTGTAGCAGCTGTGTTTCCATATCGGTAGACCAG  
TTTGCACGAGAGCCAGCCGCGATGGAGACAACAGCAATTTTCAGCACCAGTGGATAAAGTC  
CCTTTATAGATGGTACCGTCTGAGAAAGAGCCAATGATGTTACTGAAATCTTCACATGCTGC  
TTGCAGCTCTGGTAGCTGCATCCTCGGTACATCTGTGATAAGGGGATCTTGAAGCTGGCCA  
CTGGTGGTCCACGGCTTGATAGGAATTTTTCTGGTGTGGATAAAGAAAGAAGATGATTAATG  
CCACTGAGACTGTGAACACGCCAACGACTATGCCACGATCATAGAAATATTATGAGTCTT  
TTTAGTTCTTGGAGGTGGAGACAAAAGTTGTGGAGGAGGTTTCAGAAGGTGGGTTTGGGGT  
TTGTGCTGTCCTGACACTACTAGGAGGAGGGCTTGGGGTTCCATCTCCTCCTGGTGGTGT  
TTGAGTTTCTGGTGTCTGGAGGTGGTTTTGTGGAGCCTTCAAATGCTTGATCAGGAGATGGA  
GGGGAGGCACCCACAGCAGGACCTTTGCCCGGAAGAGGTGGTGTCTCTACCAAGCTGCG  
ACGGTTCCAAGAAGCTTCGGATTGGATCAGTGAGTGATCTTGAGAAGGATCAAAGAC



**20) bra-miR172d-5p (Brara.D00057.1; Beta glucosidase 10)**

GAGACGGAAGAACTAAAACAAAAAATGAAAGCTTTCTCTGTGTTATCCATTTCTGTGGT  
CATCGTTTTGGCAACAAGTCACATTGATGCTTTCACAAGAGACGATTTCCAGAGGATTTCC  
TCTTCGGAGCTGCCACGTCTGCTTATCAGTGGGAAGGAGCTGTTGATGAGGATGGAAGAA  
CTCCTAGCGTTTTGGGATACTTTCTCACCCTTTGATAACATGGACAATGGAGATATAGCATGT  
GATGGATATCACAAATACAAGGAAGATGTTAAGATAATGGCAGAAATGGGATTAGAAGCAT  
TCAGATTATCTATCTCATGGTCAAGGCTTATACCTAATGGAAGAGGACACATCAACCCAAAA  
GGTCTACTGTTTTACAAGAACCTCATCAAAGAACTACTAACCCTGGAATAAAACCACACGT  
TACACTATACCACTATGATCTCCCTCAGGCTCTTGAAGATGAGTACGGAGGATGGATCAAC  
CGCAAAATCATAGAGGACTTCACTGCTTTGTCAGATGTTTGCTTCAGAGAGTTTGGTGAAG  
ATGTGAAGCTATGGACTACAATTAACGAAGCTAACATATTCGCCATTGGAGCTTACAGCGA  
AGGAATATTGCCGCCAGGACATTGTTCTAATTCCAAATACGTCAATTGCTCCACTGGAACT  
CTTCAACTGAACCATATATTGCAGGCCATAACATATTGCTAGCTCATGCCTCTGCTTCAAAC  
TTGTATAGACTCAAGTACAAGAGTAAGCAGAGAGGATCCATAGGCCTTTGCATATATACATA  
TGGGTTATTTCTTATACTAGCTCCAAGGAAGATGAGATAGCAACTCAGAGAGCTAAAGATT  
TCTACTTTGGCTGGTTGTTAAAGCCTTTGGTGTGTTGGTGACTATCCTGATGTGATGAAGAGA  
GTTGTGGGATCTAGGTTACCTGTTTTCTCAGAGGAAGAGTCAGAGCAAGTTAGAGGATCAT  
CTGACTTTGTAGGAGTTATCCATTACACGACACTGTATGTCACAAAGAGTAGACCCACGCC  
TTCTATCCTTCCTAGCAACCAAAGTTTTCCACAGACATGGGTGTAGAGACTATCTCCATTG  
GAACTCTGTTCCATGGGGTTTTGAAGGTGTCTTGGAGTATTTGAAACAGAGCTTCAACAA  
TCCTCCTATCTACATTCTTGAAAATGGTTTAGCTACGAAACATGATTCGACGCTACAAGATA  
CATCAAGAGTTGAATACATTCAAGGTTACATTGGTGCTATGTTGAACGCCATCAGGAATGG  
ATCGGACACGAGAGGTTACTTTTATTGGTCGATGATAGACTTGTACGAGCTATTGGCTGGA  
TACAGGCTCAGCTTTGGATTGACTATGTGAATTTCAAGTATGCTGGTCTCAAGAGGTCTC  
CAAACTCTCTGCTTCTTGGTACTCTGGTTTTCTCAATGGTACAGTTGATGTTGCTCCTCGG  
GATATTACTCAGCTGCAGAGCCACTCTTCTGGTTTGTATCTTTGTGATGTTAGTTACCTAT  
ATATCTAAAGATTCTGGTTAACAACTCAAAACACAACCACATAAGCTTCCCCCGGAAGG  
AAAATAATGTTTACATATTGTTCAAATAAGCAAAAGCGCATCTGGTGTAGTGGTATCATAGT  
ACCTCCCACGGTA

21) bra-miR160a-5p (c69810\_g1\_i2; gi|379323230|gb|AFD01314.1| Auxin response factor 17-2)

ATCTGTTACGAGATGTTTATCGGTGTGAGGAGAGCTCCGAGCTCGAACAAAGGCGGCGG  
GGGAGGAAGCTACTACGGCGATGAGTACTACGCCGTTGCTACGGAGGAGGAGGAATTA  
AGAAGGAAGACGGTGGCGAGAAGAAGGGGTTTAGTAGAGTTGGGATGGGGAAGCTGACG  
GCGGAAGCGGTTTCGGAGGCGATTGGGAAAGCCTCGCAGGGTCTTCCGTTTCGAGGTTGT  
GTATTACCCACGCGGGCTGGTCTGACTTCGTGGTGAGAGCTGAAGACGTGGAGGCCT  
CCGTGAGTGTTTACTGGGCTCCTGGAAGTCAAGATGGCGATGGAGACGGAAGATT  
CCTCGAGGATCACGTGGTTTCAGGGCGTCGTCTCAGCTTCGTTTCAGGAGACGTGAAAC  
AGCTTCAGATCACATGGGATGAACCTGAGATTCTGCAGAATTTGAAGAGGGTGAATCCTTG  
GCAAGTGGAGGTGGTTGCGAGCTCAACTCAGCTTCACGCCACTTACACTCCTCCAACAAA  
GAGGTCCAAGTATCCACATGGCTCCTCAAGTGGGTTCTTGAGTGGAGGAGAGGAAGGAGA  
GATGATCTATCCTGGAAGAGGACAAGCTATGGATCCAAATCACTATGGGTACACTACTTAT  
ACTACAGTTCCTGCTGGCATGCAGGGAGCCAGGCATTACGAATTTGGGTCTTACAACA  
CAACCGGATTTCATTGGAGAAAACGCTCATCCTGAGTTCAACTTCTTTAGTCTCTTCCCGG  
TTGGGAAGAGTCTCGACGACTCAGATGATGAACTTTGCCAGTCCGCCGTCAGATGACTTGT  
CGCCTAATAGCAATACCACTAATGTTTCATCTGGAAATGACGCAGCTGGGAACAACAGAGG  
CATTAGTTTTCAGCTGTTTGGGAAGGTGATAAACGTGCAGGAGCCTGCTGAGAGCGGTGTT  
GCTGAGTCTAGCTTGTGCGAGGAGGATGGAAGCAAAGAGTCGAGTGACAATGAAGTTCCG  
AATGAGGCCAGTTGCAGGGTCATCATGAAGGAAGGTGCGGAGTCTAGGGTGCCTATAAG  
ATTCCAGCAGACACAGAGGTAATAGCTGCAAAGGTGAAGGGAATGTTGGAATCTGTACGTC  
CCAAGTAGTAGTGGTTGGTGGTAATAAAAAAAAAAAGTATCTTATGGTTTTTCTTTTCTTGCA  
TTTTGACTTTCTCT

22) bra-miR161-3p  
(TCONS\_00015119: gi|297797589|ref|XP\_002866679.1| Pentatricopeptide repeat-containing protein)

CCCAGTTGTCTCAAAGATACAGGATTTCTGGGATGAAAGCCTGGATCATGGTTTTGACCCT  
TATTGTATAATCTGTAGCACTATGACAGGAAAACGAAGCTACTAGCAATAAGCTCAAGTCGA  
CTCGCATCCCCAAAAAAGAACCTGAAATTCATAGGTCTGCACTAGCCTCTAACAATAACC  
CCTTACGTGCTATCAGGAGGTCCTTCCGTTAGCAGTTCATATGTATGAGAGCTAAACTTGC  
AGCCACTTTCCTCCATAACGGCGAACAGTTCCTAAACGCCTCCACCAGTCCCTGCTTCCC  
AACACNNNNNNNNNNNNNNNNNNNNNNNNNNNNNNNNNNNNNNNTAACGATCTTCCAAGCTATCT  
CATCATGATAATAACCACACCGAAGCAAATTCTTGAACCCCAAGCCCCTCTCTCGCTTCT  
CCGCTTTTATACAGCCCACATATCAAGATTTTGCAAGACTCTAGTTGCGGTATGTGACCAAC  
ACAGATCATATCATCTACAACCTTTGCTGCTTCCCTTAAACATTTCCAGCTTGCAGCAACAGC  
TAAGAAAAGCACTGAAAGTGGACTCACTCGGTGATACTCCTTCCCTGTTGCATGCGCTC  
AAGCACCTTTTGTGCAACTCTGAGATTCCAGTTTCGCAGATCCCTTTGATCAGCATCTCAT  
AGGATTTGGCGTTGGGAGTAACACCGTGTCTACCATTTTGTCAAGAAGCTCAACAACAAT  
GTCAAACCTCAATCNNNNNNNNNNNNNNNNNNNNNNNTATTAGCCGTCAGACAGAGATCGCTCTC  
TTTTCCATGTTTCATCTCTACCAGATGTTTGATCAGAGCCAGAAACGTATGCTGAGAAGGCT  
CACAACCATCATCAAGCATACTTTAGAACATCAAATGCAGAATCTGTCAGCCCTTGATCG  
CCATAACCTTTAATCAGAGATGAATAAGTGATGGAATCTGGGAAAACACCATCCTCCTTCAT  
CTTCCCACATCATATCCTCAGCTTCTTTCAGTTTCCCTGCGCTACAATAGCTTTGAATGAACG  
TTGTGTAGGTATGCGCATCAGGCTTTGCTCCAGATAACAACATTTCCCTGAAAACGTCTCTC  
GGCATGATCAAATCCCCTTCCCTCAGCATTCTATGAATCAAGATTGTCTCAGTAATGACTG  
TAGTCTGCACACCCTTCTCAACCATTTTCTTCTCTAACAACATGGCTTCACTCAATTTTCCAT  
CGGTGCATAAGCCATGAATCAGGGCGTTAAAAGTGGACGAGTTTGGCAAGCAACTCTTGC  
TTAACATTTTCTCAAGGATAAGTTTAGCTTCTTCTAGTTTATCTGACTTGCAGTATCCATCAA  
TCANNNNNNNNNNNNNNNNNNNNNNGTGCAGTGTACATCACCACATTTGCATCTACTACACCT  
TTCTCCTCGAGAGAATCAAACAGTTCGCGAGCTTCTTCTACTTTTTTCTTTTACACAAAGA  
ATCTATGAAACTGTTATAAGTCCANNNNNNNNNNNNNNNNNNNNNNNNNNNNNNNNNNNNNNN  
NNNNNNNNNNNNNNNNNNNNNNNNNNNNNACCAAGCAACCTATATGCACTATCGAAATTACCAGA  
CCTACACTGCGCATCAATTAATGAGTTGTAAGTGACAACACTAGGAGCCACTCTGCGCTCA  
ACCATCTTATGAAACACTCCCATCGCTTTGTGCACATTCTTCCCTACAGAACCCATGTATCAG  
CTCATTGTAAGTGCAGTGTATTCCGACTCACGTTACGCGATTCCATCAACTCCACAACGTCT  
AGCGCGTCTTCCNNNNNNNNNNNNNNNNNNNNNNNNNNNNNNNNNNNNNNNNNNNNNNNNNN  
NNNNNNNNCTGCTACAATACCCATTAATCAGTGCATTGTAAGTGACTACATTCCGGCACCAA  
CCCTTTCTCCACCATATCACCAAGCAACTCCCTCGCTTCCCTCGAACTTACGTTCACTGCAA  
GAACTACTAATAAGCACCGTGTAAGTGTGAATATTGGGTGTAATGCCTTTCTCCGACATCTC  
CTTACGCAGGTCAAGAGCTTCTGACTTCCGTTTCGATCCACACAGAGCGTTTATAAGCACC  
GTGTAAGTACGAACCGTTGGATAACAGTTATCCTCCTCCTTCATTTTCCCAAACAAGTCCAT  
CGCTTCATCGACCCTCCTCGCTACACAAAGCCCGTGTATAAGATGAGTGTACGCAACCTCG  
TTCCTTCTAAAACCTTTTGAAGCCATCTCCTCGAAAACCTTAAAAGCAGAGTCCAANNNNNN  
NNNNNNNNNNNNNNNNNNNNNNNNNNNNNNNNNNNNNNNNNNNNNNNAATACCCCATGATCAA  
GACGTATCCGTGAAGAAATCAGGTTCCAATCCAGCTTCAACGATCTTACTCACATACCGCT  
TCGCCGTAACCACATTCCCCACCTTGAATACCCAAAGACCATCTTGTTATAAGTGTAACG  
TTCGGAGAAACCTTATCATCCTCCATCATTTCATATAAAGCTTCTCCATTTTCATCAACCATT



24) bra-miR9563a-5p (c60087\_g2\_i2; gi|297833846|ref|XP\_002884805.1| Calmodulin-domain protein kinase CDPK isoform 2)

ATTAAACGCAAACGCGTTTTTCGAACTCATTAGATCATCTCCTTCAGCCTCTTCTTCTTCTTC  
TTCTCCACGATTGACTTGTTAAACAAACTATACAAAAGATTACAAATCTTGAGGTTTTATGCA  
TATGTAATTGCTATTAACCCATCCCTTCATTTTCCCTCCCTTATTTTCCGACCAATAAAAAA  
ATTGTTCTTTTTCTTGTCCATCCAGATCTTATTGATCTAAGATCATATTTCCGTTTTCTTGATT  
TCGTCTTCTGTGTTCAATTTGAATTTTCGATTTTCACATCACCTTCTGAAAAATTTCCGATT  
TTTTTTATTCTTTGGCTCATTGATTATTCTTGTGGAAGACTTCTTTCTTTGCATTTAGTCTAGC  
GACCATTGTCATTGGAGAAGAGAACCAAGTATCAGATTATTGAAGGATTTGACTTTTTCACT  
GTCTCTGATCATTTAGTAAATGAGATCAGATCAGTGTGTTCTTTTGTGATCAGATCGGTGATGT  
GAATGCGATTCTGGAGAACGTTGATTTAGGATTCATTATAAGTTAAGAGATGGGTAATGTTT  
GTGTAGGACCAAACATTCCTGGAAATGGTTTATTGCAAACCTGTTTCAGCTGCACTGTGGCG  
GCCACGGATCGGAGCTGAGCAACAAGCTTCTTCCCATGGCAGCAATGCACAAGTTCCCAAAGAAGCAGCTTCTTCCCAT  
AGAAGCAGCTTCTTCCCATGGCAGCAATGCACAAGTTCCCAAAGAAGCAGCTTCTTCCCAT  
GGCAGCAATGCACAAGTTCCCAAAGACGCAGCTGCTTCAGGACCAGAACCTGATCAAGTC  
CAGAATAAACCCCTGAGCAAGTCACTATGCCTAATCCTAGGTCCATTCCCGAAGCTGAAA  
CCAAACCCAAACCCGAACCTGAAGAAGCCAAGAAGGAAGTTGGTGTGCAGGTGGAGACAA  
CGAAGCCAGAAACAAAGCCTGAATCCATCCCGGAGTCAACAAAACCCAGAAACAAAGAGTG  
AAACCAATCCGGAGACGAAACCTGATCCCAACAAGCCTAAACATATGAGGAGATTGTCCAG  
TGCAGGTCTCAGGACCGAGTCAGTGTGTCAGAGGAAGACCGAAAACCTCAAAGAGTTCTA  
CTCACTGGGGAGGAAACTCGGACAAGGGCAGTTCGGGACTACCTTTCTATGCCTTGAAAA  
AGGCACCGGGAAAGAGTATGCTTGCAAGTCCATTTCCAAGAGGAAGCTTCTGACGGATGA  
GGACGTGGAAGATGTGAGAAGAGAGATTCAGATCATGCATCACTTGGCTGGTCATCCGAA  
TGTTATATCCATCAAAGGAGCTTATGAAGATGTTGTGGCGGTACACCTTGTGATGGAGTTG  
TGTTCAGGTGGCGAGCTTTTTGATAGGATTATCCAACGTGGGCATTACACTGAGAGGAAA

25) **bra-miRX1 (braHC-mir-X33-5p; Brara.H03095.1; FZO-like)**

GGGCCAAACGGATATTTTAGAGATAAGAAAATAATCAGAAGCACAGACGAAATCTCTCTC  
TCTCCATGAGAACTCTACTCTCACCGCCCATGTGTGACGTCACCTTTACTCATCTCCGCT  
TCATTTCCGCCGTTTCCTCGCCGGTGCATTCGGTTATCATCATTTTCTCCTCCACGTCACAA  
GCGTCTCTCTTCTCTCAATCAGAAACGCTTCGCTTGAATCCGCCGATCAAACCTTCTCCCT  
CTAGGCCGCGGACTCTTTATCCCGGTGGTTACAAGCGTCCCGAGCTCGCTGTTCCCGGTT  
TACTTCTCCGCCTCGACGCGGATGAGGTTATGAGCGGGAACCGTGACGAGACTCTTGATT  
TAATCGACCGCGCGTTAGCCAATCGGTCCAATCGTCGTGCTCGACGGCGGAGTTAACG  
CCGTAAGCTCTACGAGGCAGCTTGTGGTGAAGTCACTTGTGAAGGGCCGTGCTTACC  
TCTTGATCGCCGAACGCGTTGATATCGCCGCCGCTGTTGGTGCAGTGGTGTGCTCTCT  
CCGACGAAGGTCTTCCGGCGATAGTAGCGAGGAACACTTTGATGGGTTCAAATTCTGAGT  
CGGTGGTTCTCCCTTTGGTGGCTAGGATTGTGAAGGATGTTGAGTCTGCTCTAACTGCCTC  
TAGCTCTGAGGGTGTGATTTCTTATACTTGTGGATCTCGTGAAGATCAACAATTGGCTG  
ATTCTTTGTTGAAGAGCGTGAAGATACCCATTTTCGTGGTTTGCATAAGCAAAGGAGAAGC  
TAAGGAAGAGTTGCAGTTACTGAGATCAGGAGCATCTGGTTTCGTTGTATCTTTGCATGAT  
CTGCGCTCTTCTAGGGATGTTGCTCTTCGCCAGTTTCTTGATGGAGCTTCTTATGTTAACGA  
GAACGAAACACCATTGGTTGAGGCTAGTGACCTGCATGAGAAGGCTGCTGGCTTGGTGAA  
ATTTGAGGACAAGCAGAAAGAAATAATAGAAATGGAGAAATCAGTTTTGAGGGAGACCATT  
GAAATTATCCACAAGGCGGCTCCACTGATGGAAGAAGTCTCCCTACTGGTCGATGCAGCTT  
CCCGGATTGATGAGCCGTTTTTAATGGTTATAGTGGGGGAATTTAACTCCGGAAAATCAAC  
TGTTATCAATGCACCTTCTGGGAAGAGATACCTCAAAGAGGGTGTAGTCCCCACCACCAAT  
GAAATCACTTTTCTGTGCTACTCTGACTTAGAATCTGAGGAGCAACAACGTTGCCAAAGGC  
ATCCAGACGGCCAATACATCTGCTATCTTCTGCACCAATACTTAAGGATATCAATATCGTT  
GACACACCTGGAACATAATGTGATCCTTCAAAGGCAACAACGCTTACAGAAGAATTTGTTT  
CACGTGCAGATCTGCTTGTTCGTTCTTTCTGCTGACCGTCTTTAACTGAAAGTGAGGTT  
GCGTTTCTCCGGTATACCCAGCAGTGGAAAAAGAAATTTGTGTTTATCCTGAATAAATCTGA  
TATCTACCGTGATACTCGTGAGCTTGAAGGAGCTATCTCGTTTGTAAAGAAAATACGCAA  
AGTTGCTTAACACAGAAAATGTGATATTGTATCCTGTGTCCGCACGGTCTGCTCTTGAGGC  
GAAGCTTTCAGCAGCAGCTTTGGTAGGCAGAGATGATCTAGAGGTCTCTGATCCCGATTCT  
AAGTGGAGAACCCAGAGCTTCAGTGAACCTTGAGAAATTTCTGTACAGCTTCTAGATAGCT  
CAACTGTCACGGGGATGGAGAGAATAAGGCTTAAATTGGAGACGCCTATTGCAATTGCAGA  
GCGTCTCCTTTCTTCTGTTGAATCTCTTGTCTACAAGATTGCGTAGCTGCTAGGGAAGATT  
TGGCTTCAGCAGACAAGATTATCAATCGTACTAAAGAATACACACTTACGATGGAATATGAG  
AGCACATCTTGGAGAAGGCAGGCTCTGTCACTGATTGATAAGGCCAGATTGCAAGTTGTTG  
ATCTAATAGAATCTACCCTGAGACTTTCTAGTCTTGATCTTGCAATCTCTTACGTGTTTAAAG  
GGGAAAACCTCAGCCTCTGTAGCGGCTACATCCAAAGTTAATGGAGAAATACTCGCTCCAGC  
ACTCTCAAATGCTCAAGACCTACTTGGAAAATATGCTGAATGGCTACAATCAAATACTGCCC  
GGGAAGGGAGTCTGTCTTCAAATCATTTGAAAACAAATGGCCACAATATGTCAATTCAAAA  
ACTCAACTGGGCATAGATACATACGACTTGTTCGGAAAATAATAAATTCAGCTTAAAAC  
CATCCAGAACTTGAGTGCCGGAACCACATCAAACGGTTGGAACAAGATATTCGTGAAGTG  
TTCTTTGTGACAGTTGGTGGGCTTGGAGCTGCAGGACTTTCTGCATCACTTCTAACCTCAG  
TGCTACCCACCACATTGGAAGATCTTCTTGTCTTGGCCTTTGCTCTGCTGGAGGGTATGT

GGCTATAGCAAACCTCCCATATCGCAGGCAAGCTATAATTGGTAAGGTGAATAAAGTGGCT  
GATGCGTTGGCTCAACAACCTCGAAGATGCTATGCAAAGGATCTTTCGGATGCAACAAATA  
ATCTAGTAAACTTTGTGAATATTGTTGCCAAGCCTTACCGAGAAGAAGCTCAGCTAAGACTT  
GATCGTCTTTTAGGCATCCAGAAGGAAGCTATCAGATATTAGGAGTAAATTACAGTTGCTACA  
AGTTGAAATTGATAACCTTCATGTATTAAGATGAGACTTTAGTTGCCCAACAAAATGTCATT  
TACATTGTTCACTGGGGACAAGTGTATGTGTTGTCATACATAATGAATAAGACGTACCAGTT  
TCGACGAGTGAAATGGAGTCA

26) bra-miRX2 (braHC-mir-X75-3p; Brara.D02054.1; PHO2)

CAGGGCAACTCTCCTTTGGCTATCTCTTTCTTCGCCTCTTCTCTCTCAATGTCAAACCTAAC  
AACCACTCCCTCACGAACCACCACCAGAGAGAGAGAGCAGCAGAGAAAAACAGAGAG  
ACCCAGAAACAGAGGATAAAGCTGAAACAGAGAGAAACAGAGGATAGAGCAGAGAAACAG  
AGAGAAGGAGATAAAGTTTTCGTTTTCCAATGGTTTGGAGGTTTGTTAATGGCGTAATAGAC  
TCCTGGGACTGAAAGGGAGAAGCACTTACCCTTTGCTCATCTTCTTGATTTCTCACTTATTA  
CCAAAAACCACTACGCTTCTTATGGTTAGATGGAAATATTTAACTGATGGAGGAAACTCTG  
GCTTGAGCAATTAACGAGCTTACCATCATGCTGGTCTCACTGCTACACTGGTGGGAGTATG  
CGTGAATGAATGTCCAAGATACCGATCTTGTTTCTCACTTTGTTTCATTTTCTTGAECTACAT  
CCTGTTTTCTCTATATATACTTAAAGATTCTAGCTCCTTTTGGGCAAATCTCCTTTGGCAAAT  
AGTACAAGTGTGAAGGTTCTCCCCTTAGGTGACTTTGATACAAGTCATTTCTCTGTGGAGA  
CTTTCACCTTTGGGGCATATCTCCTTTGGCATTTTGGAECTCCAGTTACCTGTTGAGTTCCTC  
CTTCTGAAGTACTTCATTTCCATTTGTTTCGGCAAATCTCCTTTGGCATTATCAGAGTCTTT  
CACTTGGCTCACCTTTATCTCTCTAGTCCCAGCAAATCTCCTTTGGCATTATCAGAGTCCAC  
AGCTGACTCACGTTATCATCAGCAGAGCAAATCTCCTTTGGCATTATCCGAGTCTTACACTA  
TCTATCAAAGTAACTTCAGGGAAGGAAGAGACACCATTTAATCTATTAAGGCATCTATAACT  
ATGGATATGAACCTTACTGACTCCGATTGGGAGAGCTCCAGCGACAGTGGCAGCAGTGAA  
CAAGAAGAAGTGGAGTCTCTTACGGCGGACGTGCTCAAGACATCTTCTCAAACCTCGAAG  
AGACCATTGGCAAATCGATGACTTCTTGTCTTCGAGAGGGGCTTCATGTACGGTGACAT  
TGTGAGGTCCGCAGCTGAGCCCTCAGGACAGAGTGGCAGGGTTATCAACGTAGACATGTC  
TGTCAATCTCGAGAGTATTCATGGGAAGGTTGTAAGAAGTGGACACCAAGAGGCTTCAG  
AGGCTGCGTTCTATCTCACTCTGTGATTATGTGATCAACGGTCTTGGCTAGGAAGAGTTG  
ACAAGATAGTTGAGCGCGTCTCTGTCAACCCTTGACGATGGTTCTAATTACGAGGTTCTTGT  
AAGGAATCAAGATCAGCTTGTGGCTGTTCCCTCCAAATATGTTGGAGGATTCTCAGTATACTT  
ACTATCCAGGGCAGAGAGTTCAGGTTAAGCTGGCTCATGCTCCCAGATCAACTTCATGGCT  
ATGTGGGAACTGGAGGGAGAATCAAGCTTTGGGAACTGTATGTTCTGTAGAAGCAGGACTT  
GTCTACGTTGAGTGGGTTGCCTCCATCATCATGGGCGGTGGTGATAGGAACTTAACTGCA  
CCTCAAGCTTTGCAGAGTCCCTGAGAGTTTAACTTTGTTACCATCTGTTTCTCATGTAAGTTG  
GCAGCTCGGTGACTGGTGCATCCTCCCTGGCGCTTCCCCTGTGATGCAGAAGAGCTGCA  
AAAAGGTTTTAGCAGAAACATGCAGAGATCAAGCTCTGATGAGCTTTTTGTATCACCAGA  
CGAAGATGAAGGTTGATGTTTTGTGGCAAGACGGTGGATGCAGCATGGGAGTTGATTCAC  
AGCAGCTGCTTCCCGTTGGAGCTGTCAATGCTCATGATTTTTGGCCTGAGCAGTTTGTTGT  
GGAAAAGGAACTTGCAACAGCAAAGATGGGGAGTTGTGAAGGTTGTTAATGCGAAGGA  
ACAGACTGTGAAGGTGCAGTGGAGAACACTGGCTGAGAAAGAAGCAAGTGAGCAGATGGA  
GGAAGTTGTCAGTGCATATGAACTTCTCGAGCACCTGATTTTGGATTCTGTTACAGTGAT  
GTGGTGTTCAGCGTTGCTACAGAGACGAAACACCAACTTACAGATAGTGACTACAGTGGTG  
CTTATTGTTTGTCAAGCATTGGTGTGTTGTCAGGTTTCAGAAATGGTGTGTTGGAGGTGAAA  
TGGGCCAATGGTTCTACTAGTGAGGTTGCACCATATGAAATTTGGAGGATGGAAAGGTCTG  
AATTTTCAACTCTAGCACTATAAGCTCTGCAGGTAGTGTTCAAGATCTAAGTCAGAAGATA  
GCTCAATCAGATGAATCATCTTCAAACCATCAGGAAACGGGTCTAGTGAATCTCTACAGTG  
TTGGTGAAAGCTGCAACAAGAACGTTCTGGAATCTAATAGTTCATTTTTCTTCCAAAAGCT



GCCATTGGATTCATCACAAACCTAGCTTCAAGCCTATTCGGTTCTCATGGTTCTACCTCTGC  
TATAAGTTCGCATTCACGCTGCAATGACACGGAAGATCAAAGCGACTCTGAGGTCCTTGTT  
CAAGAAGCAACAGAACCACATGACATCTCTGAATCTAAATCAGATGAAGTGGATATGGACA  
TGATGGTCAACTTGCCTATAGTAGAAAAAGGAATTAACAAGACACTAGATTCAACTATAGTG  
AGCTTTAAACAGTTTTGATATGGTTACTGACTGCTCAGACCATCATTTTCTTTTCTCCGGGGAA  
AGAGTTGGCACAATCTCCGGTTACAAAGAGTTGGGTGAAGAAAGTCCAACAAGAGTGGAG  
CAATTTGGAGGCAGATCTTCCCAACACAATATACGTGCGTGTGTATGAAGAAAGGATGGAC  
CTTATCCGTGCAGCCCTAGTTGGTGCCCTGGAACACCATACCATGATGGACTTTTCTTTTT  
TGACATAATGCTTCCACCACAGTATCCTCATGAGCCTCCAATGGTGCATTATCATTCAGGTG  
GGATGCGACTGAATCCTAACCTGTACGAGTCAGGAAGAGTCTGCCTGAGTCTGTTGAATAC  
ATGGAATGGCTCTGGCACTGAAATGTGGAACCCAGGGAGCTCCTCAATCCTTCAAGTCCTT  
CTCTCGTTTCAGGCTCTTGTTCTGAATGAGAAGCCTTACTTCAACGAAGCTGGCTATGATAA  
GCAGTTGGGCCGAGCTGAGGGAGAGAAAACTCTGTGAGTTACAATGAGAATGCATTTCT  
CATCACCTGCAAATCTATGATCTCGTTACTCCGCAAGCCTCCAAGCATTGAGGTGCTT  
GTGAAGGACCACTTCAAGCACCGAGCGCAGCATGTTCTGGCCGCGTGCAAGGCTTACATG  
GAAGGCGTCCCTGTAGGATCATCAGCGAAACTTCAGGAGAGCTCAACCACAACTCCACA  
GGTTTCAAGATCATGCTCACTAACTCTATCCAAACTTGTGCAAGCATTCTCAGAAATTGG  
AGTTGATTGCAGCCAAGGGGTTGCACTTGAACCATGAAGGTTTGACACTGTTAGTAACATC  
TCCCTAACATCCAATAACTAATGTATAATATTGGTTTGCAAAGGATGGTAAGTCCCTTCCCA  
TGCAGAATATGTTTTGTAATAAAATGTGTGAAGAATAAAGAAGCCTGTAACATAGACTCAT  
CTTGATAATACCAAAGGGTTGCCATGTACCATGTTTTGTAATAAAATGAAATACTCGTG  
TTT



28) bra-miRX4 (braHC-mir-X15-3-3p; Brara.B00890.1; BREVIS RADIX-like 4)

ACCATAAAAATCTTTCTTTTCGTTTTAGGTTTCTCAAAGGTCAGAGCCGGTTTTGCATGTAT  
CGATAATTGAATCCTTAAGCACACTTGAAATACTTGACTACAATGAACAGCCTTTGATACAT  
CTGAAAGTCTAAATCTGCAAGCAGCAATAATGTAAAATCTCTCGATTTAAGCTACATTGACA  
AGTGAATCCCGCTCAAGTTGTCTTACTTAATCAGTAGACCAAACAAAATGGTTTACTTTTA  
GCATTAACCGAGTGTGATTAGATTAGCGGATTTACCGTAGAGATGACGCGGGACCTTTTCT  
TGATTTTTAATTAAAAAAATGGAACCGGTCTTCCTGGTTAAAGTGAGTATAAAAAACATAAAAA  
GAGCACCATGACCAAACACACAACACAAACAAAGTTAGAAACTGACAGCATCTACTGTCT  
CTCCGTATCCAAAAAGAGAAGAAACAAAATCACATTACCAAGAAACAGCAGCTGCCGGAAA  
ATGCTGACTTGTATAGCTCGTTCGAAGCGAGCCGGCGATGAAACCTCGGGTCAACCCGAC  
GATCCGGATTCCAAGCAAGCCAAATCTCTAACATCTCAGCTCAAAGATATGGCTCTGAAAG  
CTTCCGGTGCTTACCGACATTGTACGCCGTGTACGGAGGGGGAAGTGCAACCGCCGATCA  
AGAGCACTCCGGTGACGACAAAGTCTGATCCCGAATCTGATCAACGGTTTAAATGCTGTA  
CGGTAGATCAAACAGCTCGATAACAGCCACGGCGGCGGCGGCGGCGGACGCAACAGCAAC  
AGCCTAGAGTTTGGGAAAAGAGATGGAGGCGAGGCTGAAAGGGATATCGAGCGGCGAG  
GCGACTCCGAAGTCGGCGAGCGGGAGGAACCGGGTAGACCCGATAGTGTTCGTGGAGGA  
GAAAGAGCCAAAGGAGTGGGTGCTCAGGTGGAGCCAGGTGTTCTCATTACGTTTCGTGTC  
TCTTCTCGGCGGTGGTAATGATCTCAAGCGGATACGTTTCAGCCGAGACATGTTCAACAAG  
TTACAAGCGCAAAGATGGTGGGCAGATAACTATGACAAAGTGATGGAACTTTATAATGTTC  
AAAACTAAGCCGCCAAGCCTTTCCCTTCCCACGCCTCCTAGATCCCAAGACGAGAAGG  
AGTATCATCCAGAGGATACTCCTACAACACCGCCTTTAAACAAGAACGGTTGCCTCGCAA  
CATCCATCGTCCAGCTGGATTGGCTGGTTGCTCATCTTCGGATTCCCTCGACCACAGTTCA  
ACCCAAAGCCGGCAGTTTAACTGACTCTGGAATACTAACTCAACTCCTAACTCTCAAGCC  
TAAGCGGAGCCAAAACAGAAACATCTTCCATAACAAGCTGCTCGTCCAGAGACGCAGACC  
GGTCAGAAGAGATGTCTGTAAGCAATGCGAGTGATGTTGATCAGAACGAGTGGGTGGAGC  
AAGATGAGCCTGGCGTTTATATCACCATTAAAGTCTTACCATGTGGGAAAAGAGAGCTTAG  
AAGAGTCAGATTCAGCCGAGAGATATTTGGGGAGATGCATGCGAGGGTATGGTGGGAAGA  
AACAGGGCAAGGATACATGAACAATACTTGTGATCATCTTCTGGTTTATAGATGCATTAACC  
GGTTTTGTGTTTTTTATTTTTTCTCATTCTCGGTATACTGTTTATTCCAAGCTGAAGTAAAA  
GAGAACCCTTCCGTAAGCACTCCTTGTGCCTCCTAGTCACACATATTTAAATATCAACTGC  
GGAATATGTTTAAAGGAGTTTCATATTTTTTTCCTTAAACAAAAGAAAATGCTTAAGCTTGA  
ATATATAGTGTGGCTGGTTTGTCAATATATGTATCGTTGGT

**29) bra-miRX5 (braHC-mir-X18-3p; Brara.K00675.1; CBL10; calcineurin B-like protein 10)**

ATGGACTTGCCGGGAGTTTCCTCTAGATCAAGCTCTCTTACCGTAGGAGAGCAACTCTGCG  
TCGTCTTTATACCTCTCTTCGTCATTTTTGATTTCTTTTCTCCACCGTTGGACAATGCTTCG  
ATTGCCGCAGCCGCTGTTGCCTCAGATATTTTCAGTCAACGAGGTTGAAGCATTGTATGA  
GTTATTCAAGAACTTAGTTGTTCAATTATTGACGACGGGTTGATTCACAAGGAAGAGCTTC  
AGCTAGCGCTTTTCCAAGCTCCACATGGCGAGAACCTATTTCTTGATAGGGTTTTTTATTTG  
TTCGATGAAAAGAAGAATGGGGTTATAGAGTTTGAAGAATTCATCCATGCCTTGAGTGTGTT  
TCATCCCTACGCACCAATCGAGGAGAAGATCGACTGTAAGAATCATAGCACCATAACTATT  
CAATGTCCTACTATTAATAATATACCGCTTTATGATCTAAGACAAACCGGATTTATTGAGCG  
AGAAGAGGTGCATCAGATGGTGGCTGCTATTCTTATGGAATCTGAAATGATTATGTCTGAT  
GAACTTCTGACCATGATTATTGATAAAACATTTGCTGATGCAGATTCTGATGAAGATGGTAA  
AATAAGCAAAGAAGAATGGAAAGTGTATGTGCTTAAGCATCCCACCTTGTTGAAGAACATG  
ACTCTTCCTTATCTTAAGGATGTGATGACAGTATTCCAAGCTTTATATTCAACACTGAGGT  
TGAAGACTAA
